# Supplementary material for: Concurrently Enhanced Piezoelectric Performance and Curie Temperature in Stressed Lead-free BCTZ Ceramics
Source: Research Square preprint supplement (doi:10.21203/rs.3.rs-5601097/v1), 2024-12-16
Supplement: Supplementary file 1 [file 9eec7246c1d521171976282d.docx]

Supplementary Information

Concurrently Enhanced Piezoelectric Performance and Curie Temperature in Stressed Lead-free BCTZ Ceramics

Yuanhui Su1, Qingying Wang1, Yu Huan1*, Jianli Wang2, Wei Sun3, Yongjun Li4, Tao Wei1*, Zhenxiang Cheng2*

1School of Material Science and Engineering, University of Jinan, Jinan 250022, China

2Institute for Superconducting and Electronic Materials, Faculty of Engineering and Information Sciences, University of Wollongong, Innovation Campus, North Wollongong, NSW 2500, Australia

3Shandong Provincial Key Laboratory of Preparation and Measurement of Building Materials, University of Jinan, Jinan 250022, China

4Bruker (Beijing) Scientific Technology Co., Ltd, Beijing 100192, China

***Corresponding Authors. E-mail: mse_huany@ujn.edu.cn (Y. Huan), mse_weit@ujn.edu.cn (T. Wei), cheng@uow.edu.au (Z. Cheng).

**1. Supplementary Notes**

**Note 1: The *P*‒*E* analysis of BCTZ−*x*AlN ceramics.**

Supplementary Fig. 7 illustrates the *P*‒*E* hysteresis loops of the BCTZ‒*x*AlN‒300 ceramics, where all ceramics exhibit well-saturated ferroelectric loops. The corresponding *P*max and *P*r, values are summarized in the Supplementary Fig. 8. The *P*max and*P*r dramatically increase with increasing *x* contents, reaching their respective peak values of 18.9 μC cm−2 and 9.54 μC cm−2at *x* = 1.75, and then decrease sharply.

**Note 2: The TG-DSC analysis of BCTZ and BCTZ−1.75AlN−300 powder.**

As shown in the Supplementary Fig. 16a, the TG profile of BCTZ powder exhibits three distinct regions of weight loss. The initial weight loss of 0.16% beyond 300  oC is primarily due to the evaporation of residual moisture. The weight loss observed between 300 and 1000 oC is predominantly associated with the decomposition of carbonates. When temperature exceeds 1000 oC, a decrease in weight accompanied by an endothermic peak is observed, which is attributed to ceramics densification and oxygen release.

Similarly, the BCTZ−1.75AlN−300 powder (Supplementary Fig. 16b) exhibits comparable weight loss characteristics. However, unlike BCTZ, a sharp weight increases and an exothermic peak occurs within in the temperature range of 1000–1150 oC, corresponding to the reaction between AlN and oxygen as well as Ba2+, leading to the formation of BaAl2O4. The subsequent decrease in weight corresponds to the ceramics densification and oxygen release.

**Note 3: The EDS element mapping analysis of BCTZ−*x*AlN ceramics.**

The element distribution in BCTZ−*x*AlN ceramics is investigated using EDS element mapping analysis (Supplementary Figs. 23–25). In all ceramics, Ba, Zr, Ti, and O exhibit uniform distribution. Regarding the Al element, in BCTZ−*x*AlN−50 ceramics, it is dispersed within the matrix grains and distributed along the grain boundaries. However, in BCTZ−*x*AlN−300 and BCTZ−*x*AlN−3000 ceramics, the Al element is also concentrated within strip-like BaAl2O4 particles. Additionally, a minor dissolution of CaO particles is observed in BCTZ−*x*AlN−300 and BCTZ−*x*AlN−3000 ceramics. This can be attributed to the generation of BaAl2O4 in the ceramics, resulting in the production of CaO to maintain chemical balance.

**Note 4: The domain configuration of ceramics.**

The evolution of domain configuration was further examined using bright-field transmission electron microscopy (TEM), as illustrated in Supplementary Fig. 26. A large number of typical stripe and herringbone domains are found in all the BCTZ and BCTZ−1.75AlN−300 ceramics, respectively. Post-AlN doping, a modest decrease in domain structure size of BCTZ−1.75AlN−300 ceramic (180 nm) is observed in comparison to undoped BCTZ ceramic (210 nm).

**Note 5: The average grain size of BaAl2O4 in the BCTZ–*x*AlN ceramics.**

The average grain size distribution of BaAl2O4 in the BCTZ−*x*AlN−300 and BCTZ−*x*AlN−3000 ceramics was measured, with the results shown in Supplementary Fig. 27. In BCTZ−*x*AlN−50 ceramics, the BaAl2O4 secondary phase particles are nano-sized and plate-like, aggregating at the grain boundaries. This characteristic can also be clearly seen in EDS mapping of BCTZ−1.75AlN−50 ceramics (Supplementary Fig. 23). Due to the extremely small thickness of the BaAl2O4 particles in the BCTZ−*x*AlN−50 ceramics，their average grain size distribution is not included in the Supplementary Fig. 27.

For BCTZ−*x*AlN−300 and BCTZ−*x*AlN−3000 ceramics, the BaAl2O4 grains exhibit a micro-sized, strip-like shape (Supplementary Figs.23–25). As the doping concentration increases, the size of these BaAl2O4 grains also increases. Additionally, the grain size of BaAl2O4 in BCTZ−*x*AlN−3000 ceramics is larger than that in BCTZ−*x*AlN−300 ceramics at the same doping level.

**Note 6: The thermal expansion coefficient of BCTZ and BaAl2O4****ceramics.**

To determine the thermal expansion coefficient of the secondary phase BaAl2O4 of BCTZ−1.75AlN−300 ceramic, pure BaAl2O4 ceramics were prepared using conventional solid-state reaction method. Raw material powders (BaCO3 and Al2O3) were mixed and ball-milled for 12 hours, dried at 75 oC, and calcined at 1300 oC for 5 hours. The obtained BaAl2O4 powders were ball-milled again for 12 hours, dried at 75 oC, pressed into blocks (5×5×25 mm3), and then sintered at 1700 oC for 6 hours. As shown in Supplementary Fig. 29a, all diffraction peaks of BaAl2O4 powders matched JCPDS No.17-0306, confirming the successful preparation of BaAl2O4 ceramic.

The temperature dependence of the thermal expansion coefficient of BCTZ and BaAl2O4 ceramics is shown in Supplementary Fig. 29b. The BCTZ ceramic has an average linear coefficient of thermal expansion of about 11.3 × 10−6 K−1 in the testing temperature range of 30 – 1100 oC, which is significantly higher than that of BaAl2O4 ceramic (5.8 × 10−6 K−1).

**Note 7: The KPFM analysis of BCTZ ceramic.**

Topographies and surface potential mapping of untreated BCTZ ceramic were captured using KPFM, as depicted in the Supplementary Fig. 34a–b. Supplementary Fig. 34a depicts a color map of the surface topographies in micrometers, with different colors indicating varying topographic features. The BCTZ ceramic exhibits irregularly shaped grains. Supplementary Fig. 34b presents the corresponding surface potential map, revealing a relatively uniform potential distribution with no significant increases in potential across the grains.

**Note 8: The coercive electric field of BCTZ−*x*AlN ceramics.**

Supplementary Fig. 35a compares the *P−E* loops curves of BCTZ, BCTZ−1.75AlN−50, BCTZ−1.75AlN−300, and BCTZ−1.75AlN−3000 ceramics measured at 30 kV cm−1. The differences (Δ*E*C) between the negative *E*C (*E*C−) and positive *E*C (*E*C+) for BCTZ−*x*AlN are summarized in Supplementary Fig. 35b. As shown, Δ*E*C of AlN-doped ceramics is significantly higher than in the undoped ceramics. Among the doping concentrations *x* from 1.00 to 1.75, the BCTZ−*x*AlN−3000 ceramics exhibit the highest Δ*E*C, followed by BCTZ−*x*AlN−300 ceramics, and then BCTZ−*x*AlN−50 ceramics. This indicates that the secondary phase significantly affects the *E*C of the ceramics.

It is worth noting that adding AlN to BCTZ ceramics results in two effects: the formation of BaAl2O4 secondary phases of varying sizes and the incorporation of different amounts Al3+ into the lattice. The BaAl2O4 secondary phase introduces an internal electric field at the interface between BaAl2O4 and BCZT. At the same doping level, as the AlN particle size increases, the resulting larger BaAl2O4 secondary phase enhances the local electric field, while the amount of Al3+ incorporated into the lattice decreases. The observed variation in Δ*E*C arises from the combined influence of this internal electric field and Al3+ doping. As shown in Supplementary Fig. 34, the increase in Δ*E*C with larger AlN particle sizes is attributed to the stronger internal electric field created by the larger secondary phase. For BCTZ−*x*AlN−50 ceramics, with nanoscale secondary phases, the substantial incorporation of Al3+ into the lattice leads to an increase in Δ*E*C as the doping concentration increases.

**Note 9: The impedance spectra analysis of BCTZ−*x*AlN−300** **ceramics.**

All the impedance spectra exhibit two distinct semicircles, which can be attributed to the differences in thermally activated electrical properties between grains (semicircle at high frequencies) and grain boundaries (semicircle at lower frequencies).[1] The impedance spectra were analyzed by fitting them to an equivalent circuit model (Supplementary Fig. 37). This model includes a resistance for grains (*R*g) in parallel with a constant phase element for grains (*CPE*g), as well as a resistance for grain boundaries (*R*gb) in parallel with a constant phase element for grain boundaries (*CPE*gb). The activation energy (*E*a) of grains and grain boundaries is determined by the Arrhenius equation:

(S1)

where *σ*,*σ*0, *k*, and *T* represent conductivity, high-temperature limit of the conductivity, Boltzmann constant, and absolute temperature, respectively.

# 2. Supplementary Figures


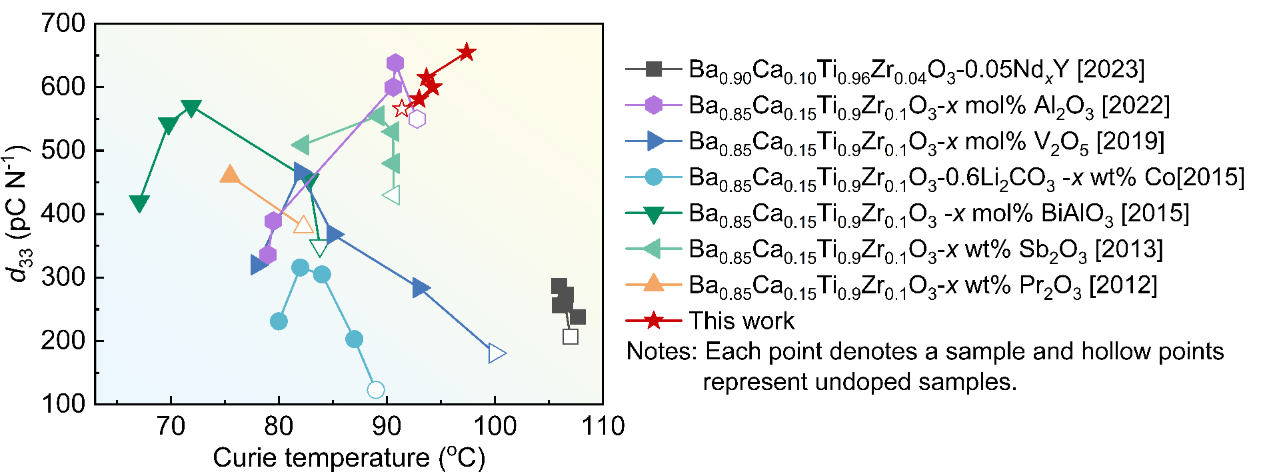


**Supplementary Fig. 1** Comparison of *d*33 and *T*c in BCTZ-based piezoceramics. (Notes: Each point denotes a sample and hollow points represent undoped samples.)[2-8]

**
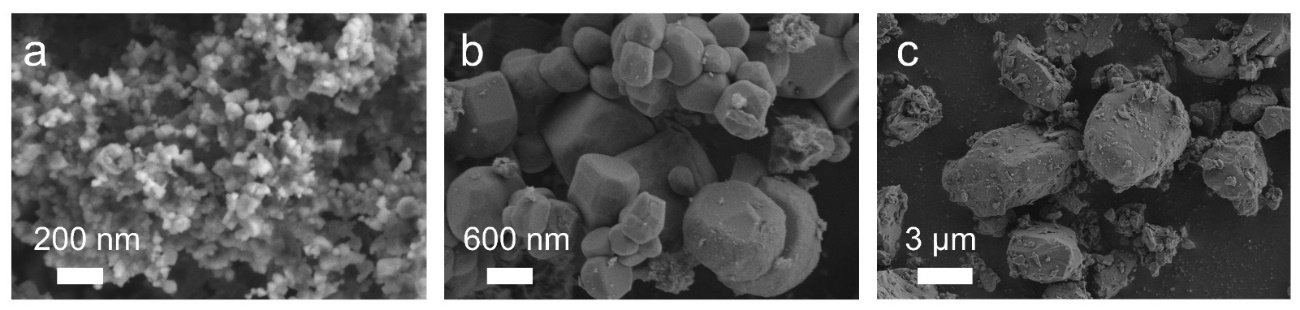
**

**Supplementary Fig. 2.** The SEM images of AlN material used in this work with average size of (**a**) 50 nm, (**b**) 300 nm, and (**c**) 3000 nm.





**Supplementary Fig. 3.** The *ε*r−*T* and tan*δ*−*T* curve of BCTZ−*x*AlN−50 ceramics.





**Supplementary Fig. 4.** The *ε*r−*T* and tan*δ*−*T* curve of BCTZ−*x*AlN−300 ceramics.





**Supplementary Fig. 5.** The *ε*r−*T* and tan*δ*−*T* curve of BCTZ−*x*AlN−3000 ceramics.


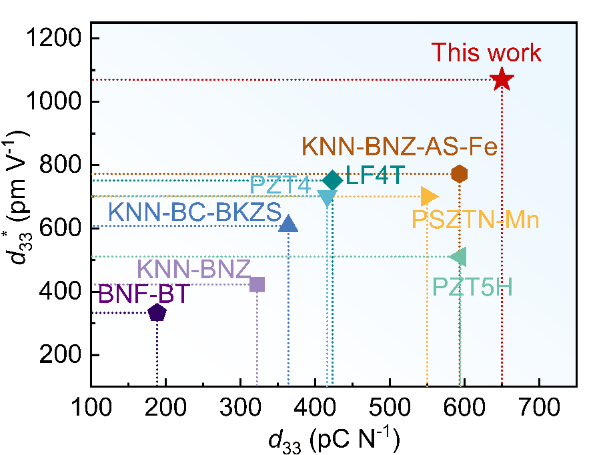


**Supplementary Fig. 6.** Summary of *d*33*vs. *d*33 for other piezoceramics.[3, 9]


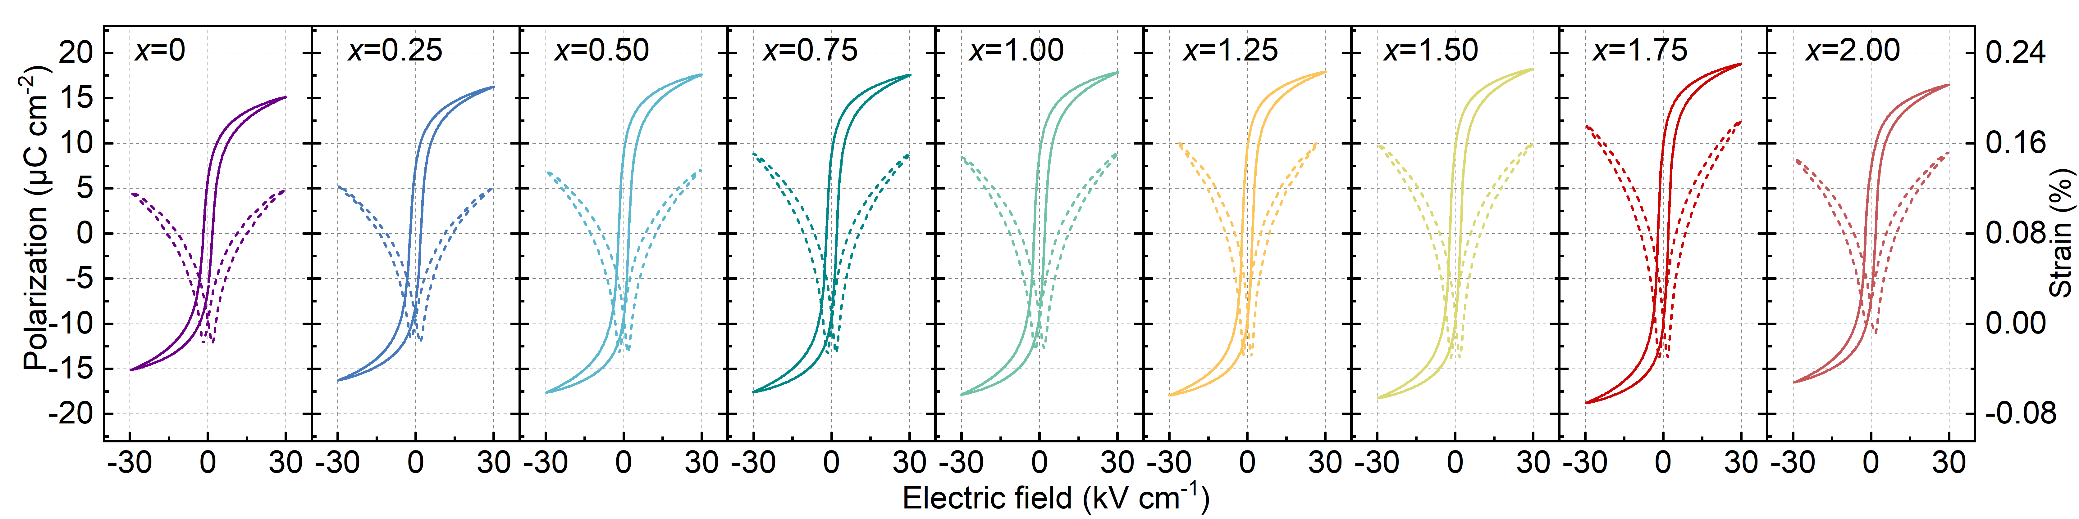


**Supplementary Fig. 7.** The *P−E* loops curves of BCTZ−*x*AlN−300 ceramics measured at a frequency of 1 Hz.


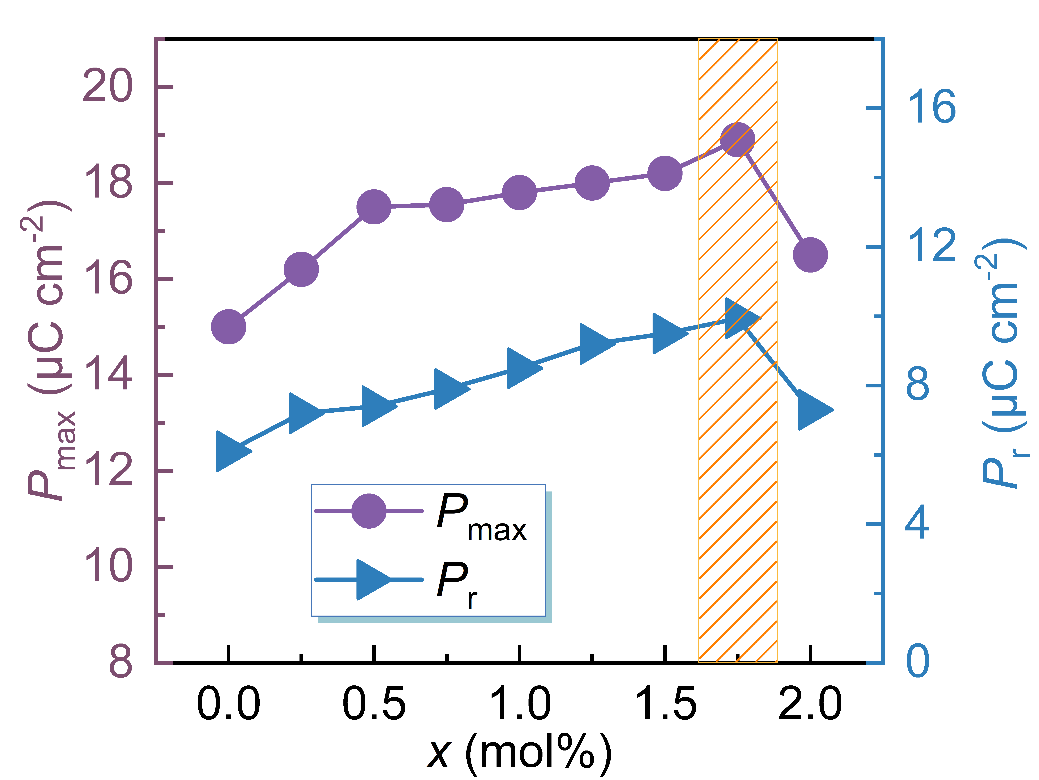


**Supplementary Fig. 8.** The *P*max and *P*r of BCTZ−*x*AlN−300 ceramics measured at 30 kV cm−1.


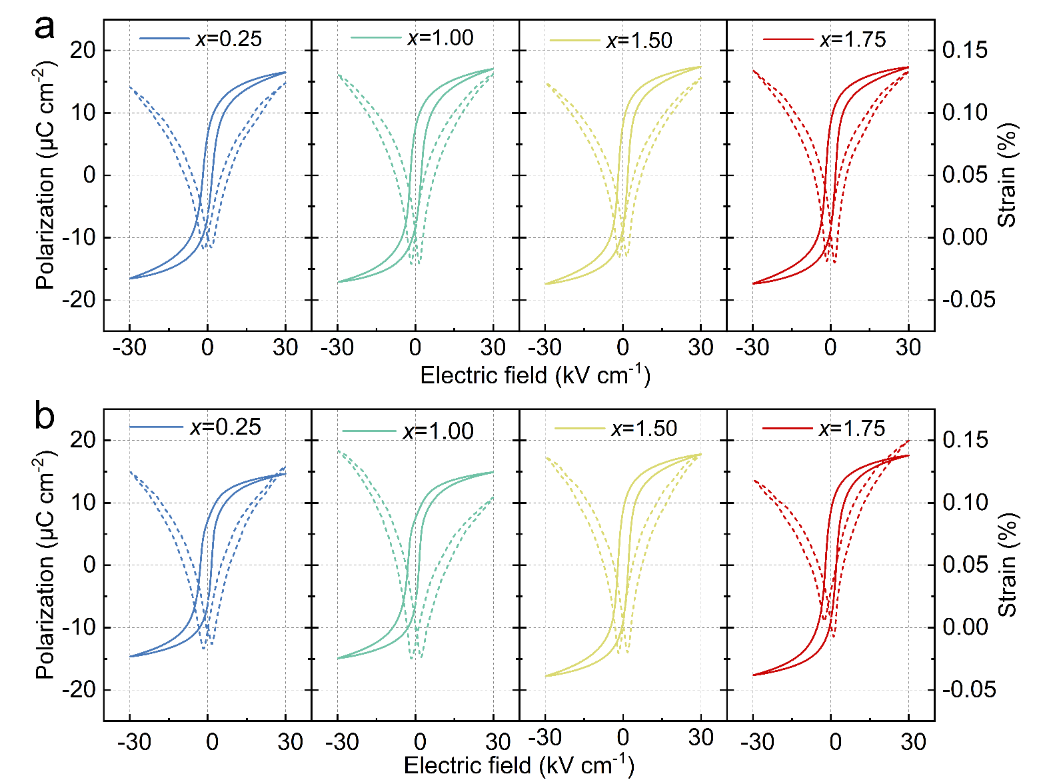


**Supplementary Fig. 9.** The *P−E* loops curves of (**a**) BCTZ−*x*AlN−50 and

(**b**) BCTZ−*x*AlN−3000 ceramics measured at a frequency of 1 Hz.

.
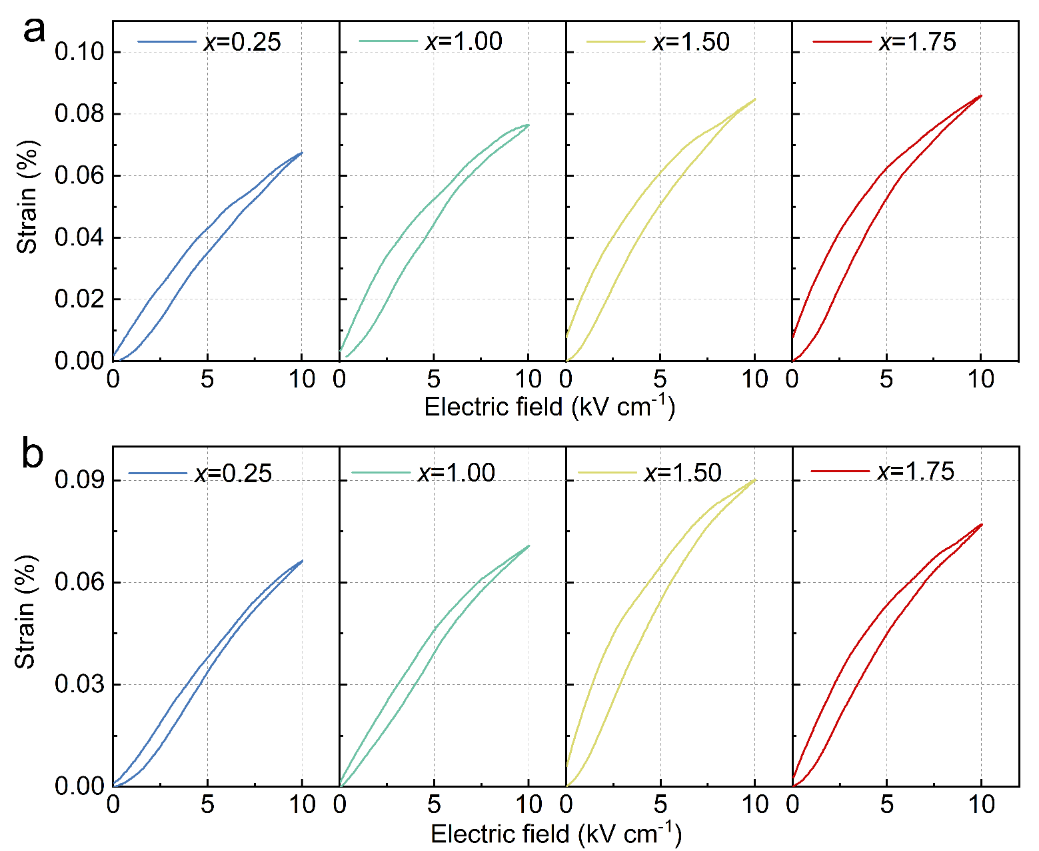


**Supplementary Fig. 10.** The *S−E* loops curves of (**a**) BCTZ−*x*AlN−50 and

(**b**)BCTZ−*x*AlN−3000 ceramics measured at a frequency of 1 Hz.


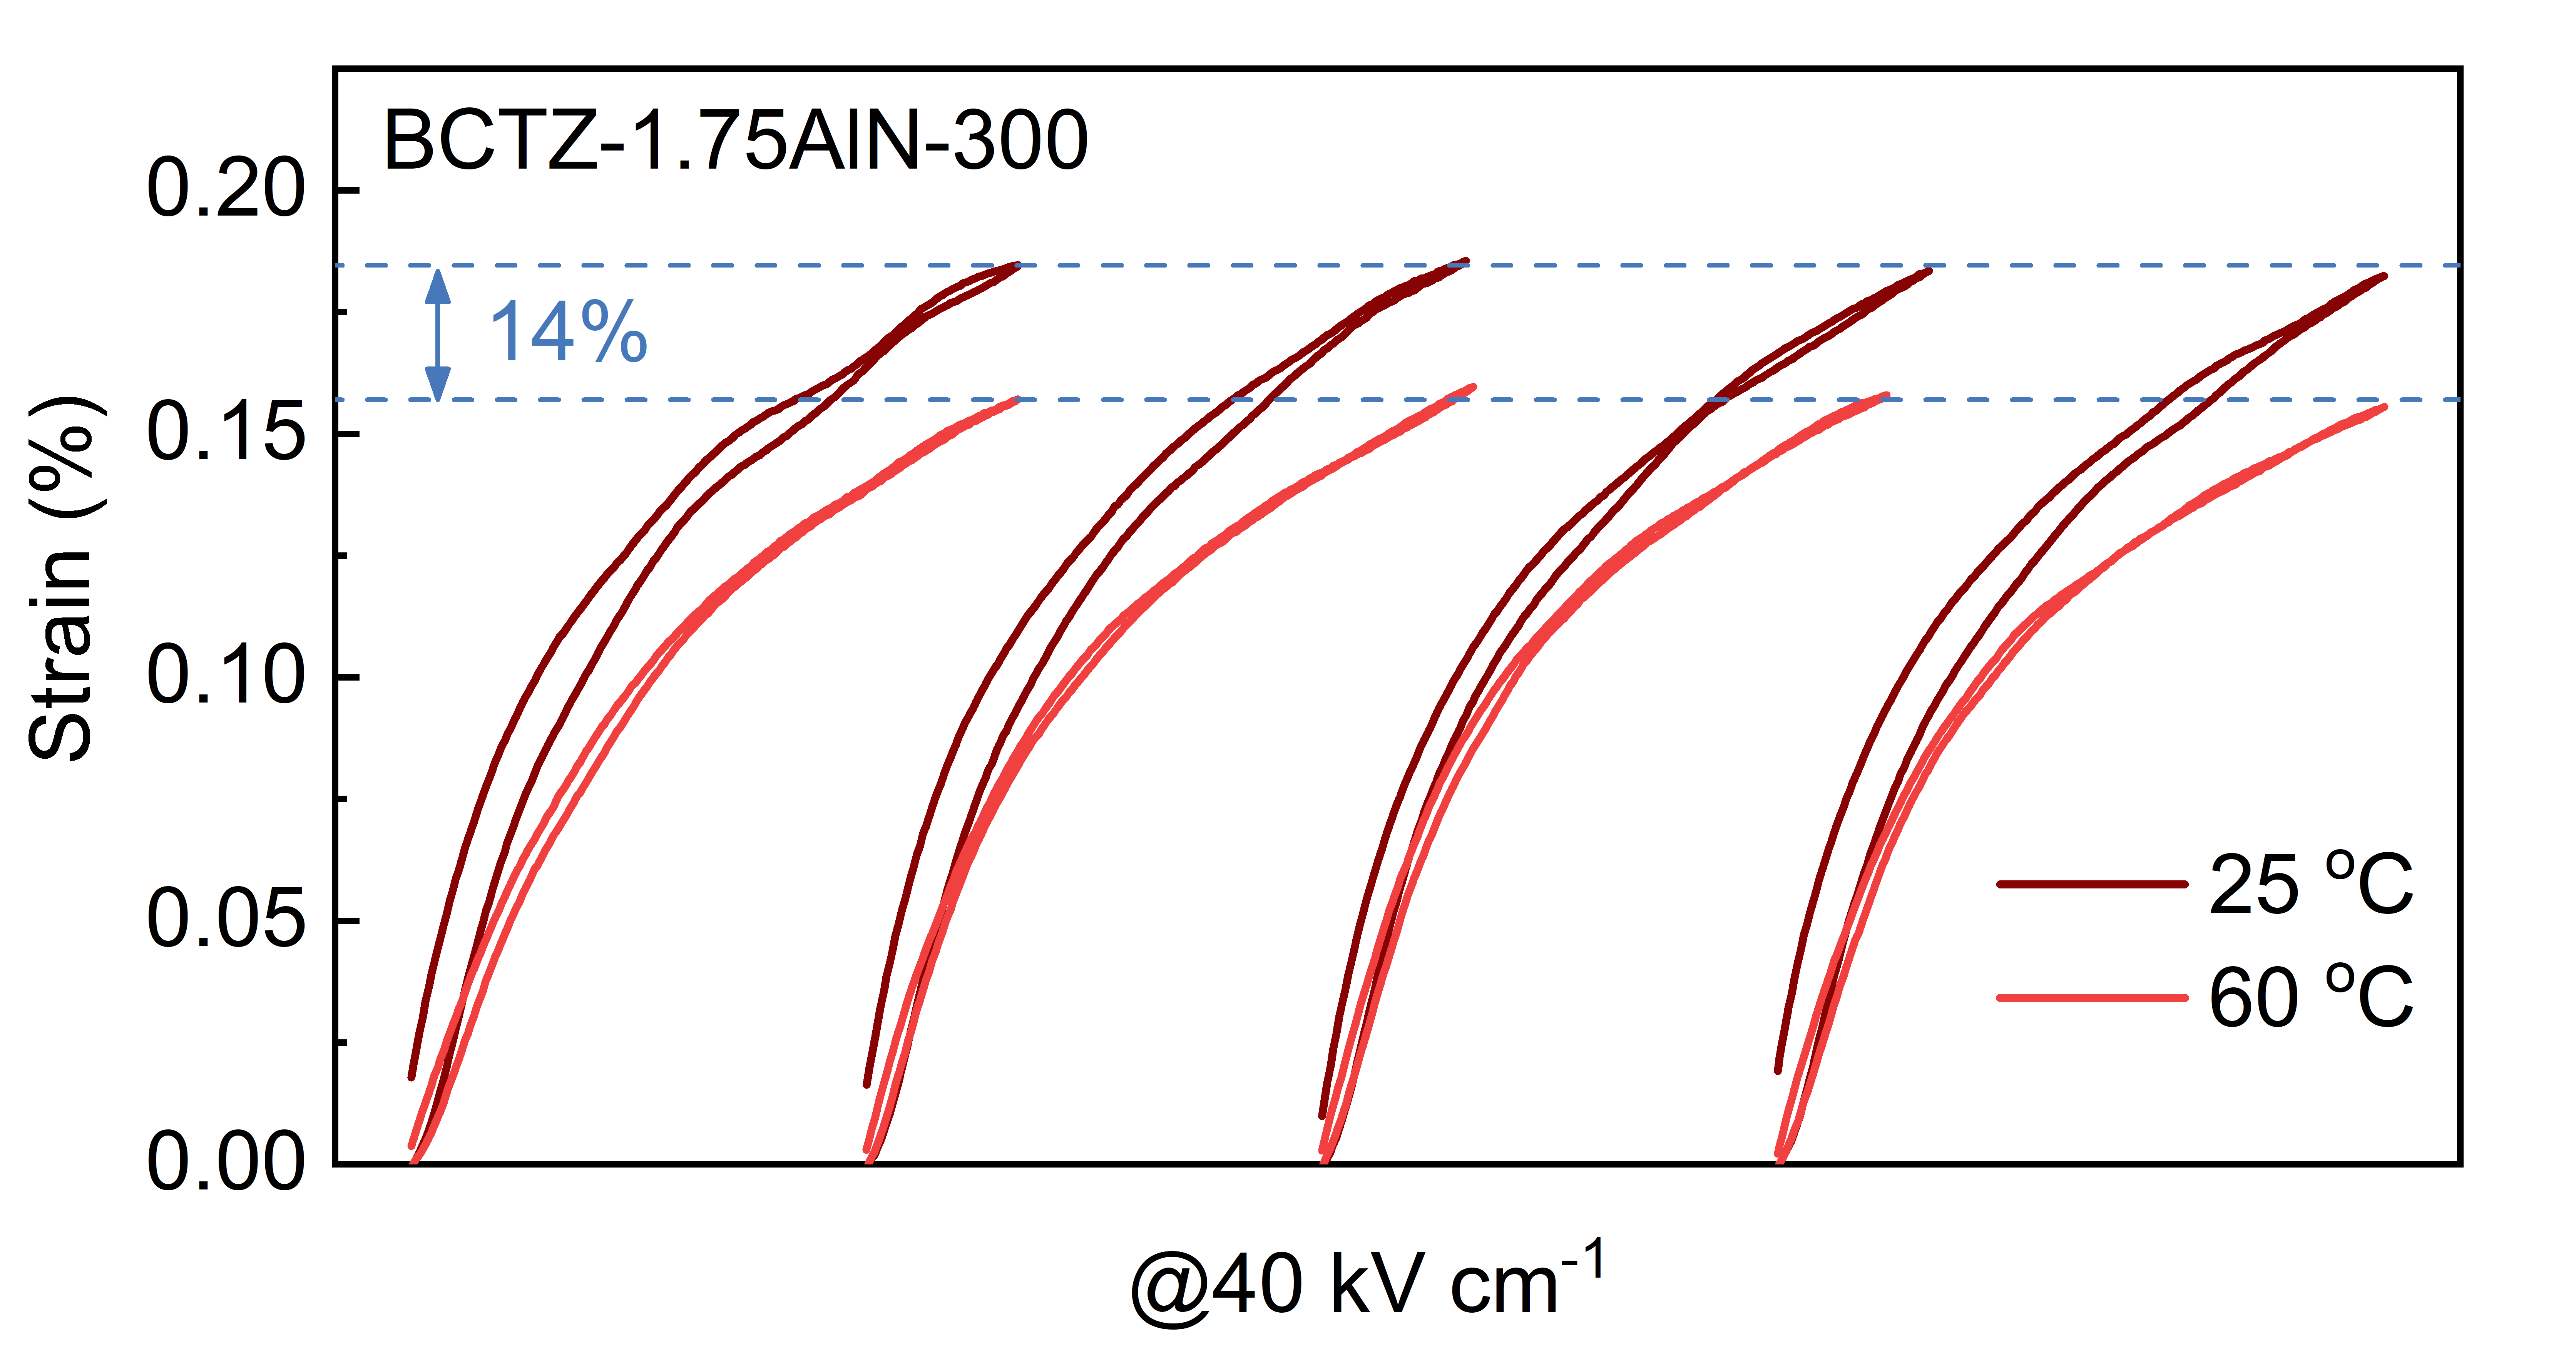


**Supplementary Fig. 11.** Temperature-dependent unipolar strain curves of multiple BCTZ–1.75AlN–300 ceramics measured at 20 oC and 60 oC.


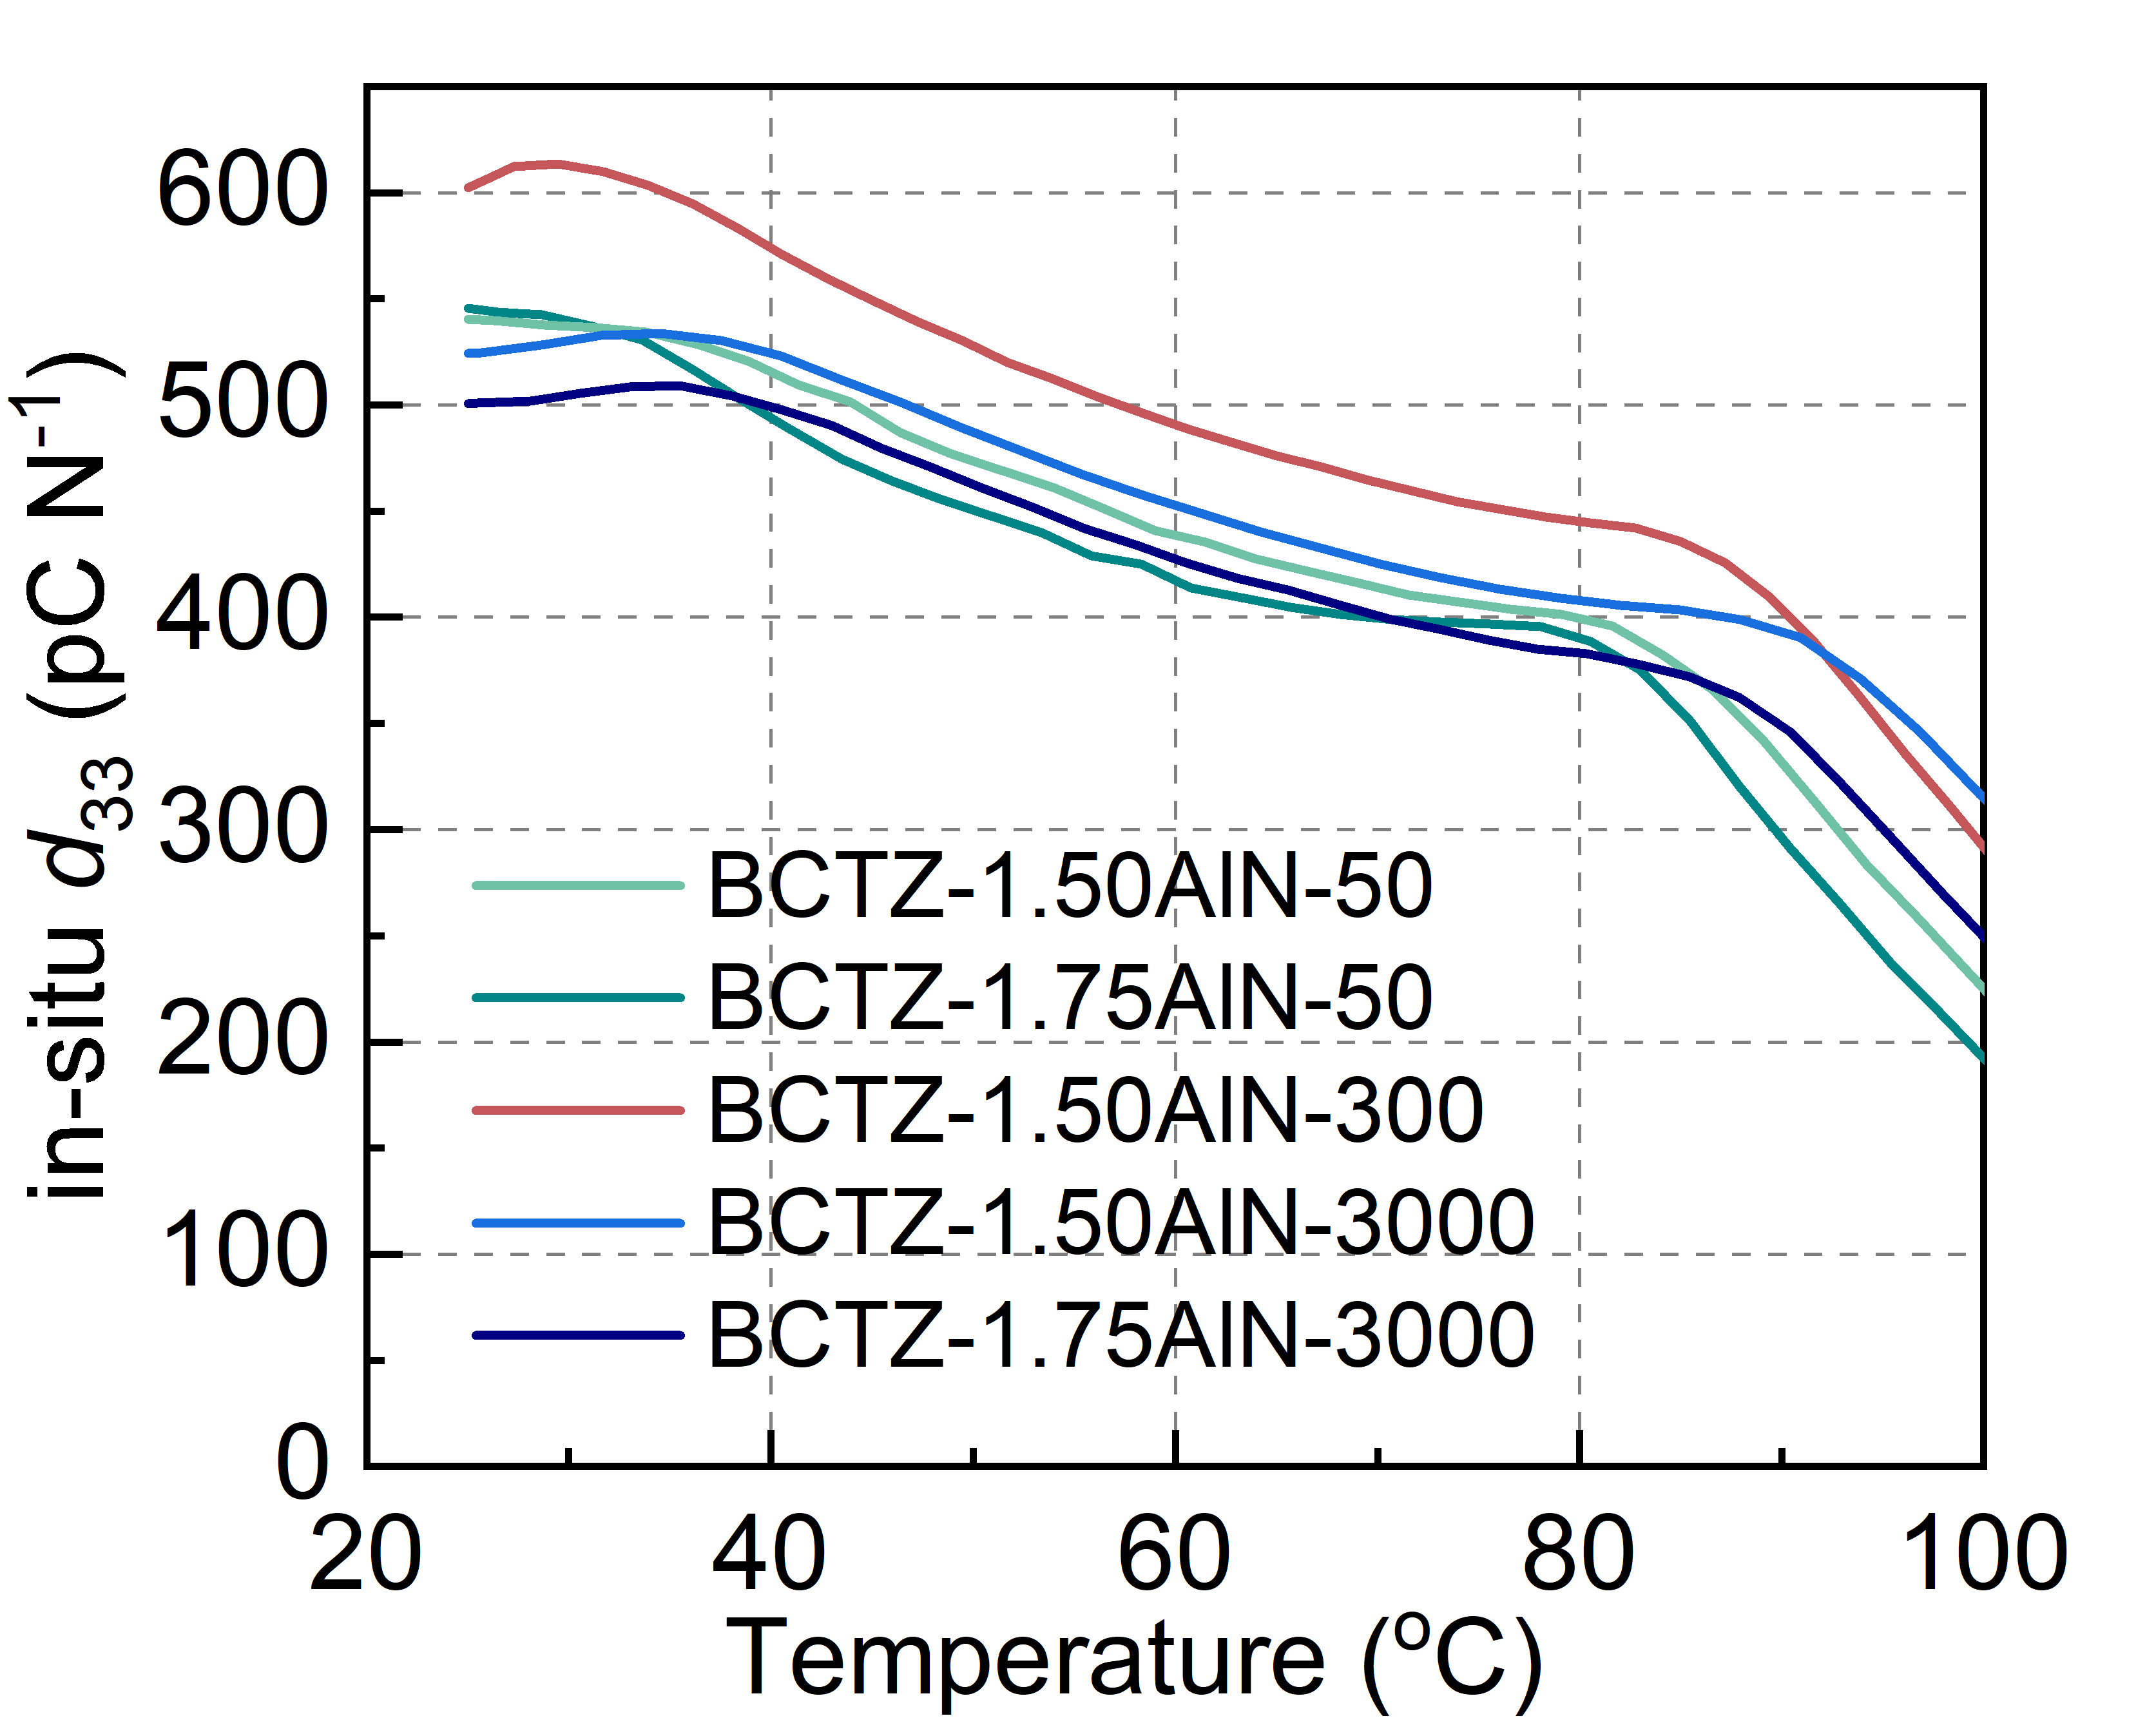


**Supplementary Fig. 12.** The in-situ *d*33 of ceramic as a function of temperature for BCTZ–1.50AlN–50, BCTZ–1.75AlN–50, BCTZ–1.50AlN–300, BCTZ–1.50AlN–3000, and BCTZ–1.75AlN–3000 ceramics.


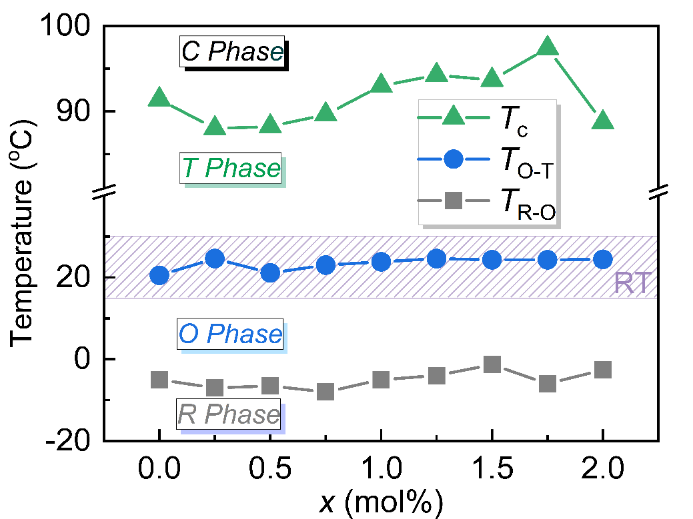


**Supplementary Fig. 13.** The phase transition temperatures of BCTZ−*x*AlN−300 ceramics.


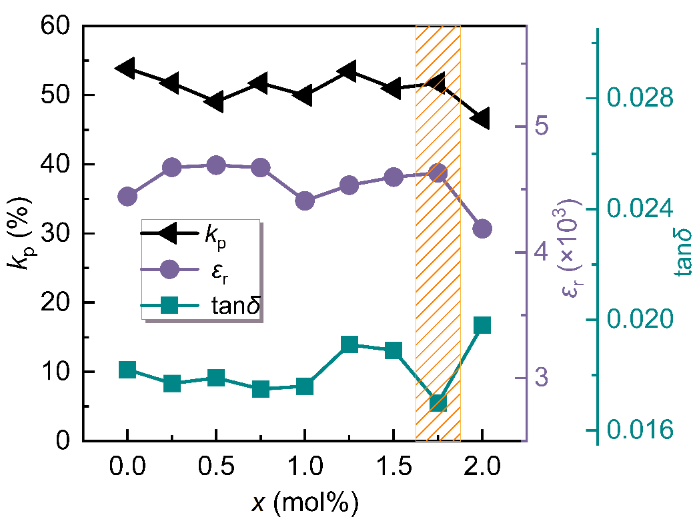


**Supplementary Fig. 14.** The electromechanical coupling coefficient (*k*p), dielectric constant (*ε*r), and dielectric loss (tan*δ*) of BCTZ−*x*AlN−300ceramics.


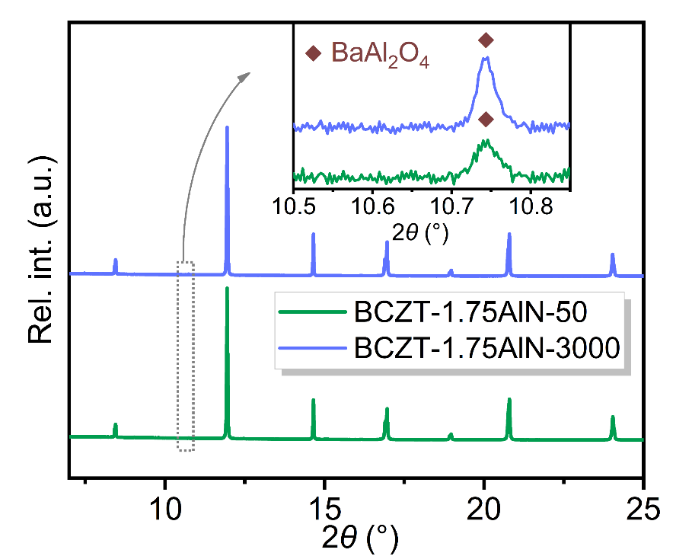


**Supplementary Fig. 15.** The high-resolution SXRD patterns of BCTZ−1.75AlN−50 and BCTZ−1.75AlN−3000 ceramics at room temperature. Inset is the enlarged region between 10.5o and 10.82o.


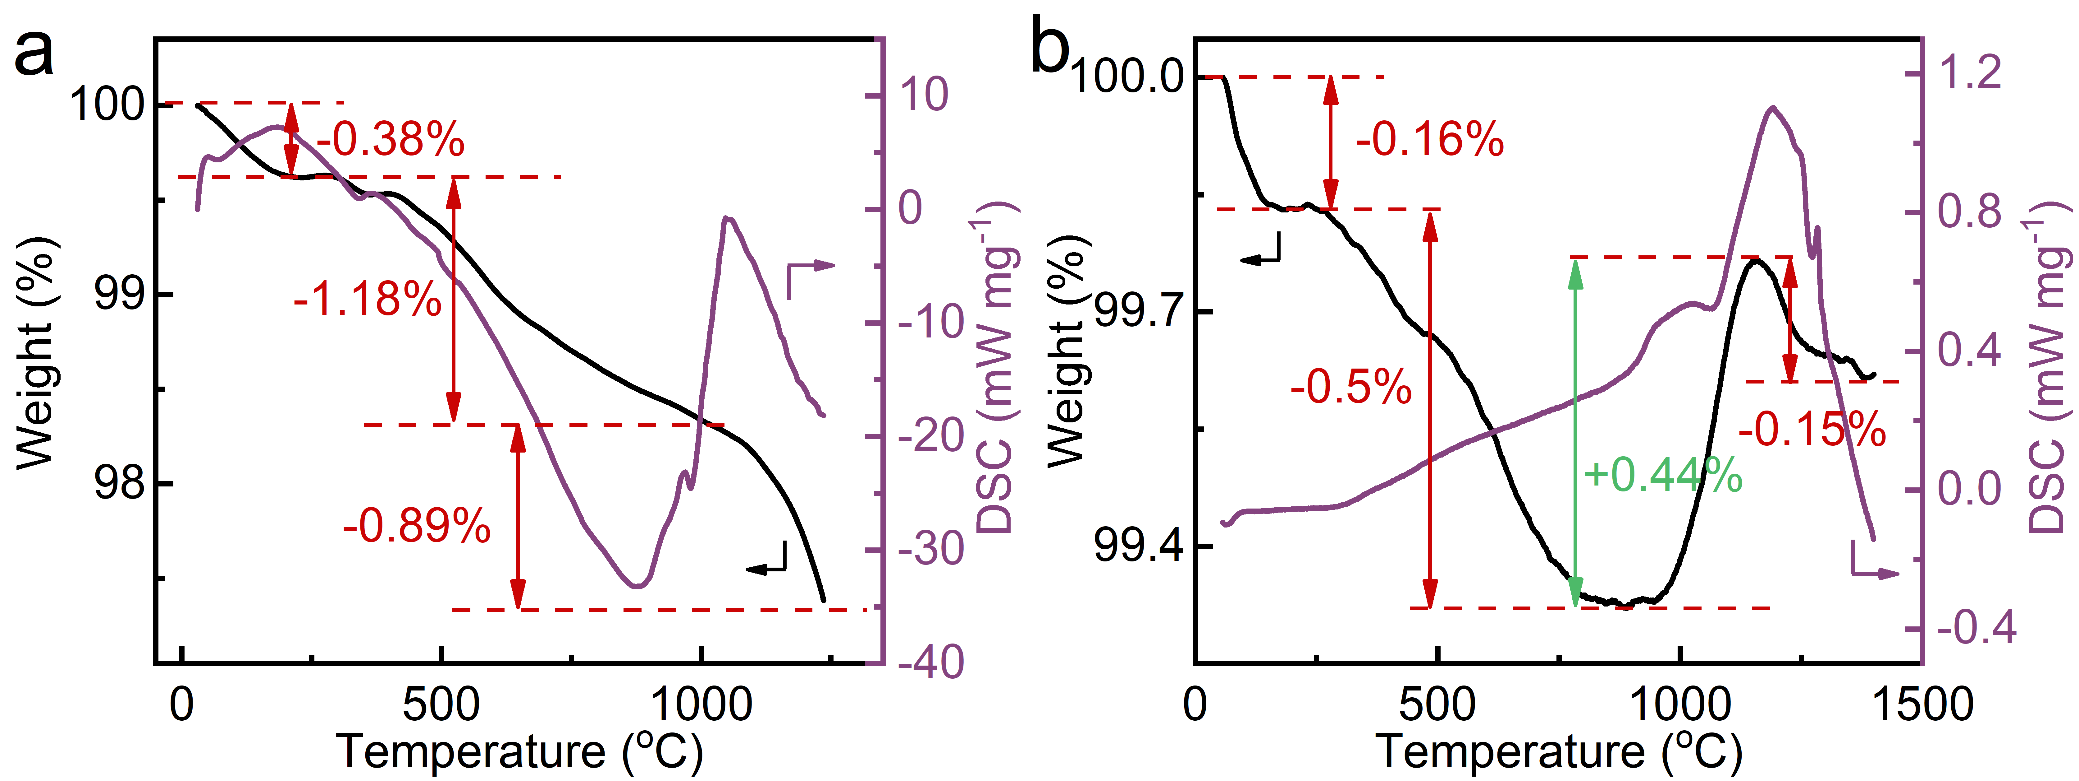


**Supplementary Fig. 16.** The TG–DSC curves of (a) BCTZ and (b) BCTZ −1.75AlN−300 powders.


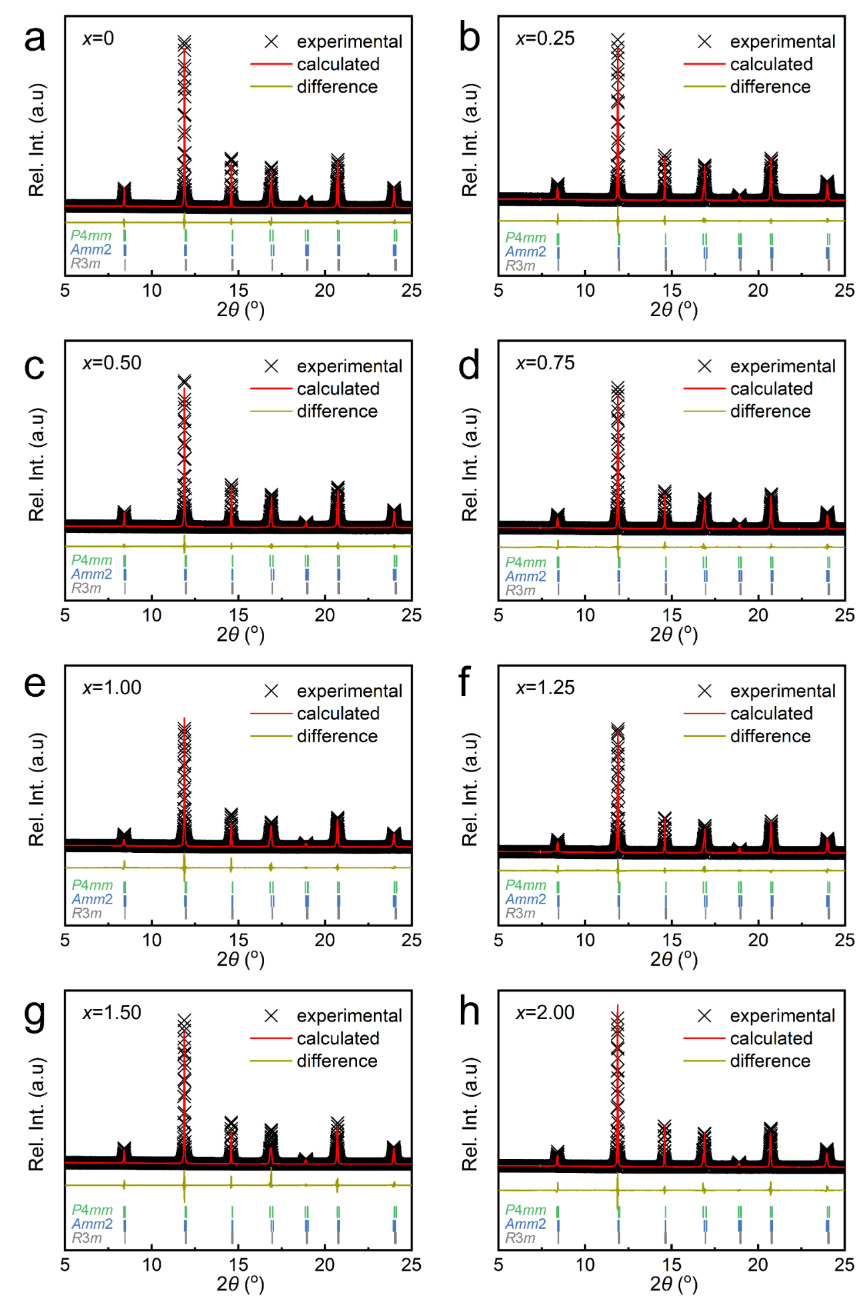


**Supplementary Fig. 17** Rietveld SXRD refinement results of BCTZ−*x*AlN−300 ceramics: (**a**) *x* = 0, (**b**) *x* = 0.25, (**c**) *x* = 0.50, (**d**) *x* = 0.75, (**e**) *x* = 1.00, (**f**) *x* = 1.25, (**g**) *x* = 1.50, and (**h**) *x* = 2.00.


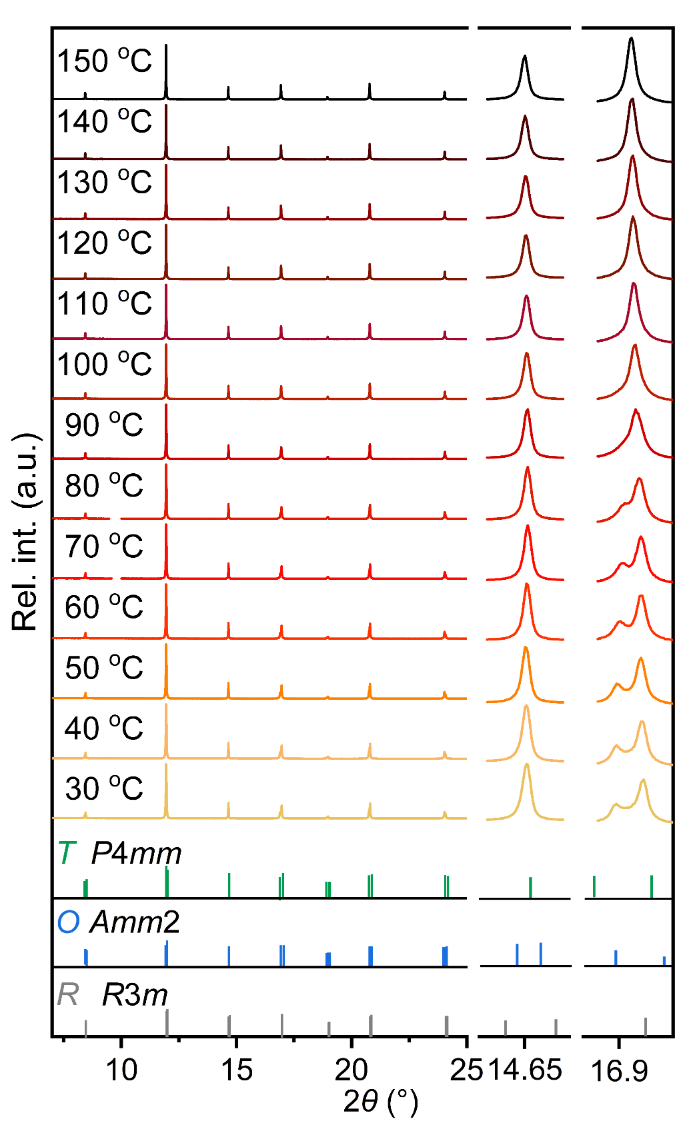


**Supplementary Fig. 18.** The in-situ variable-temperature high-resolution SXRD of BCTZ−1.75AlN−300 ceramics.


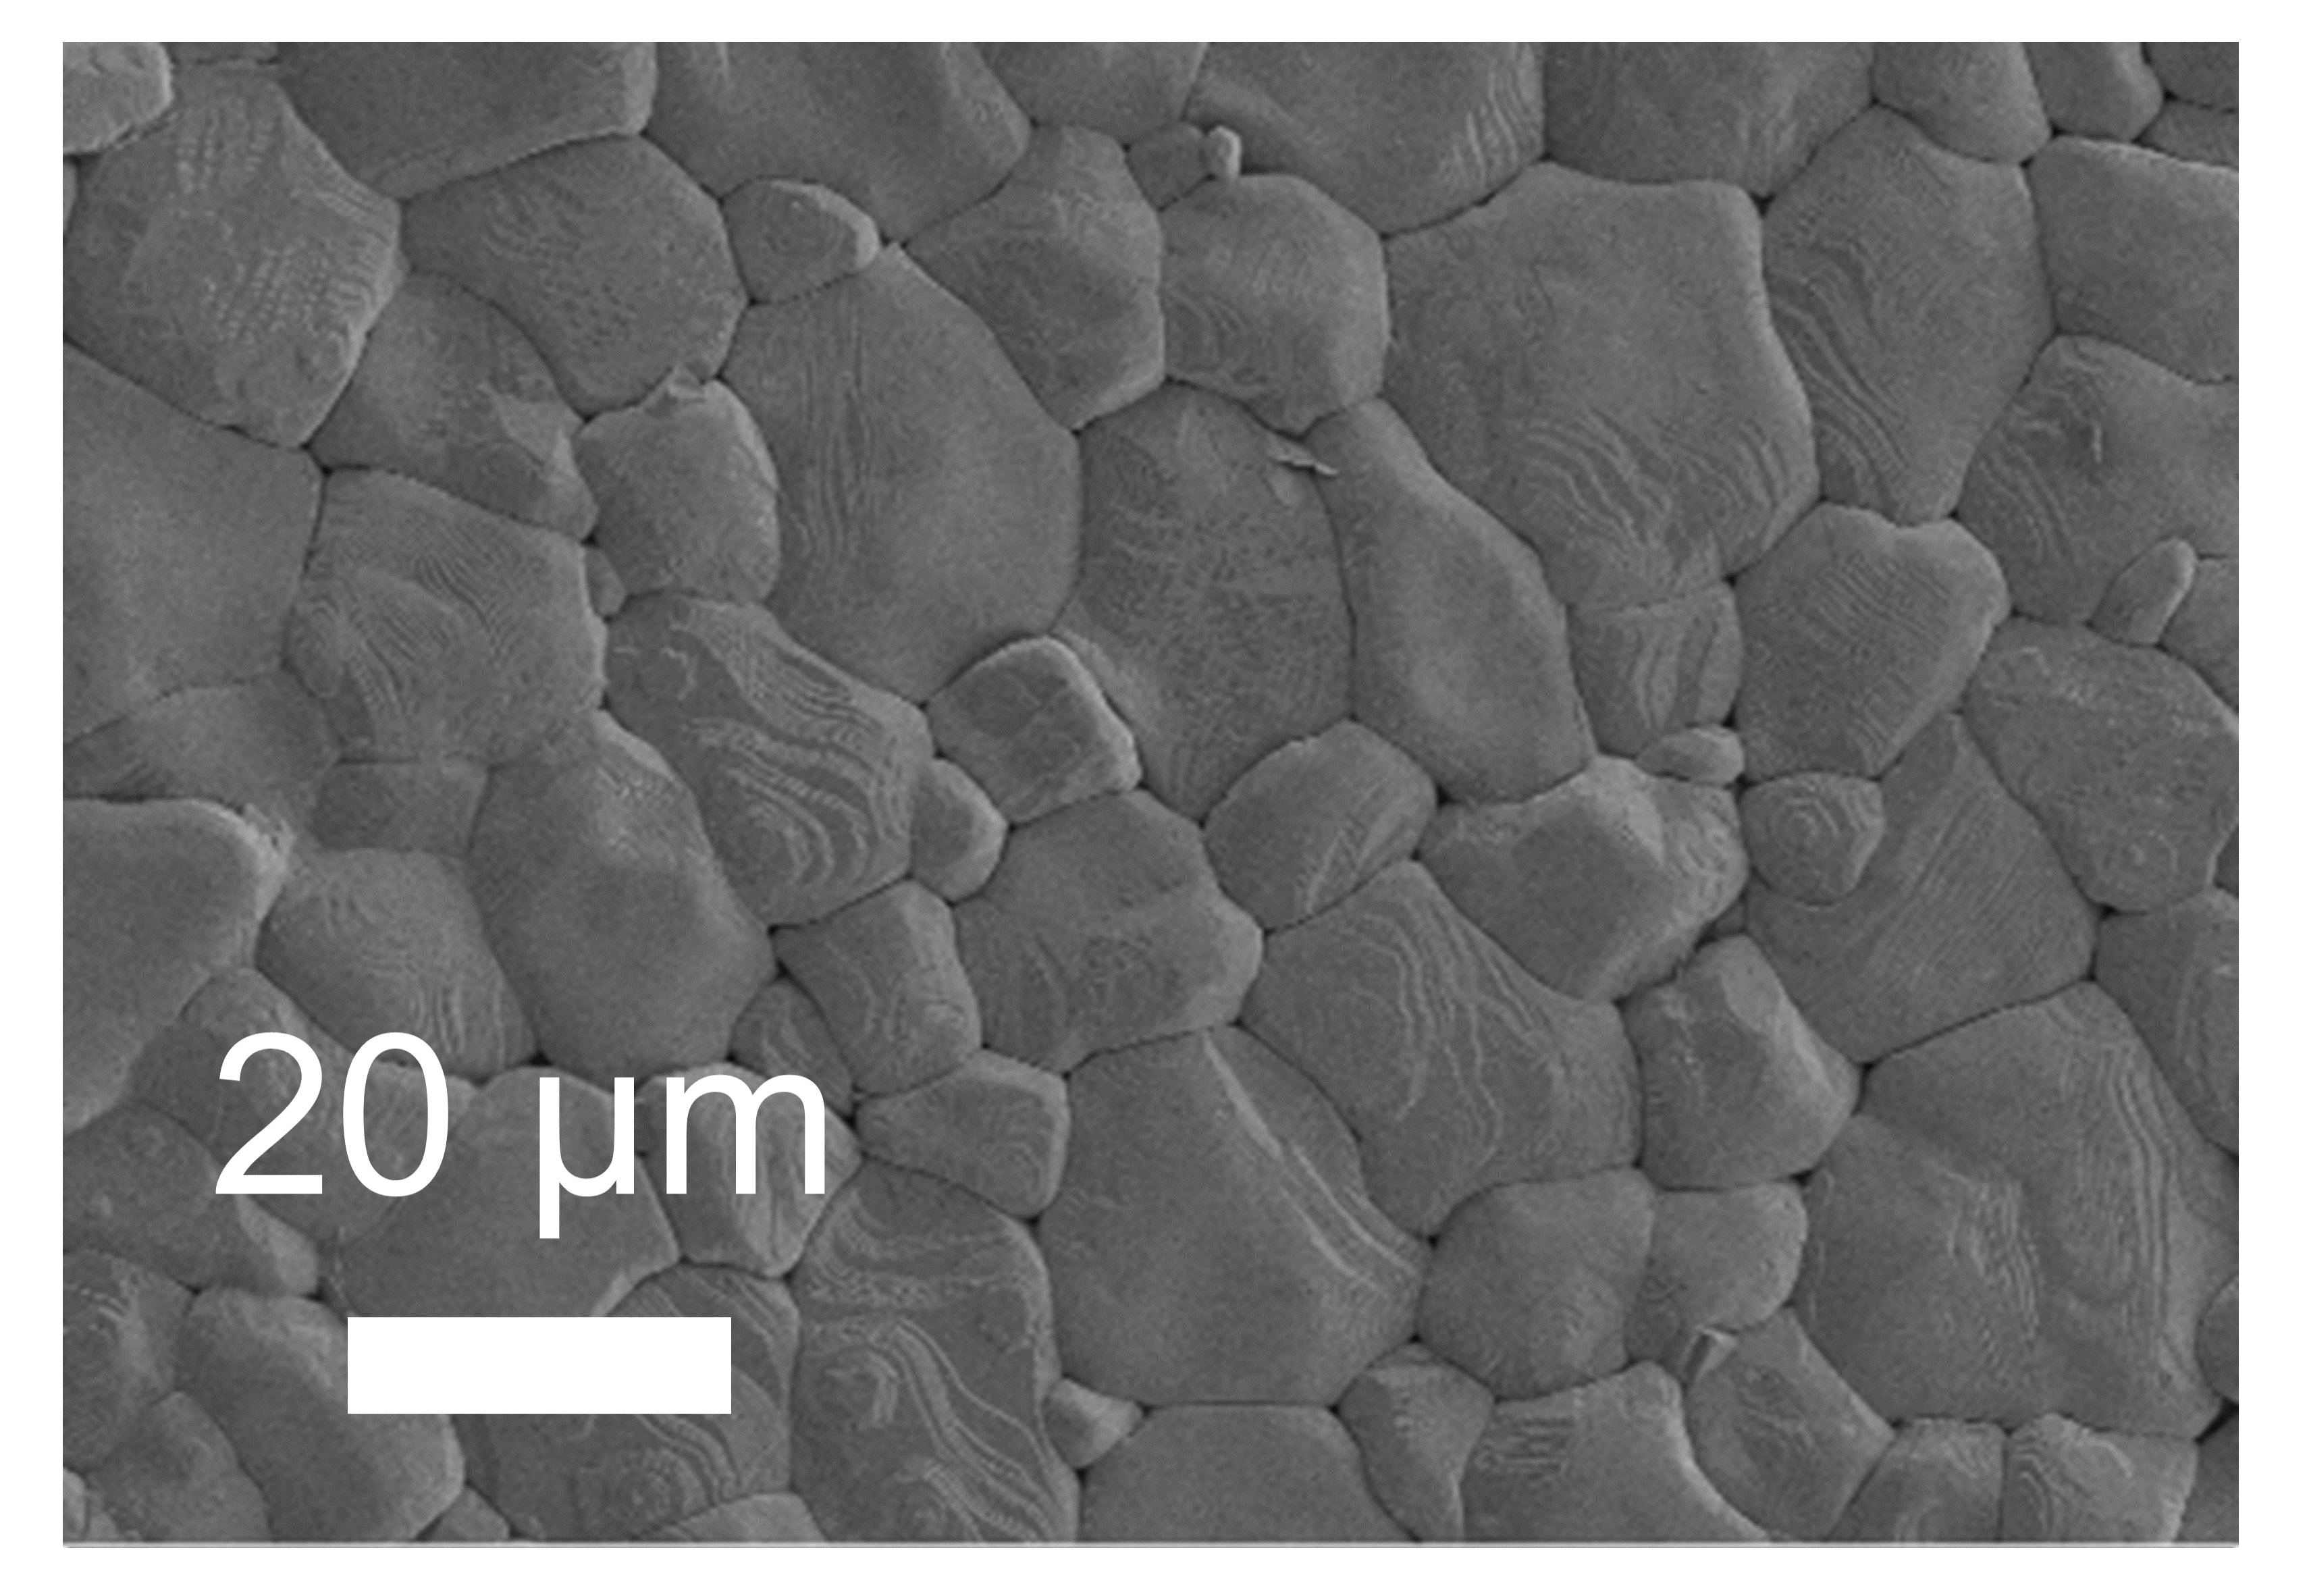


**Supplementary Fig. 19.** The SEM images of BCTZ ceramics.


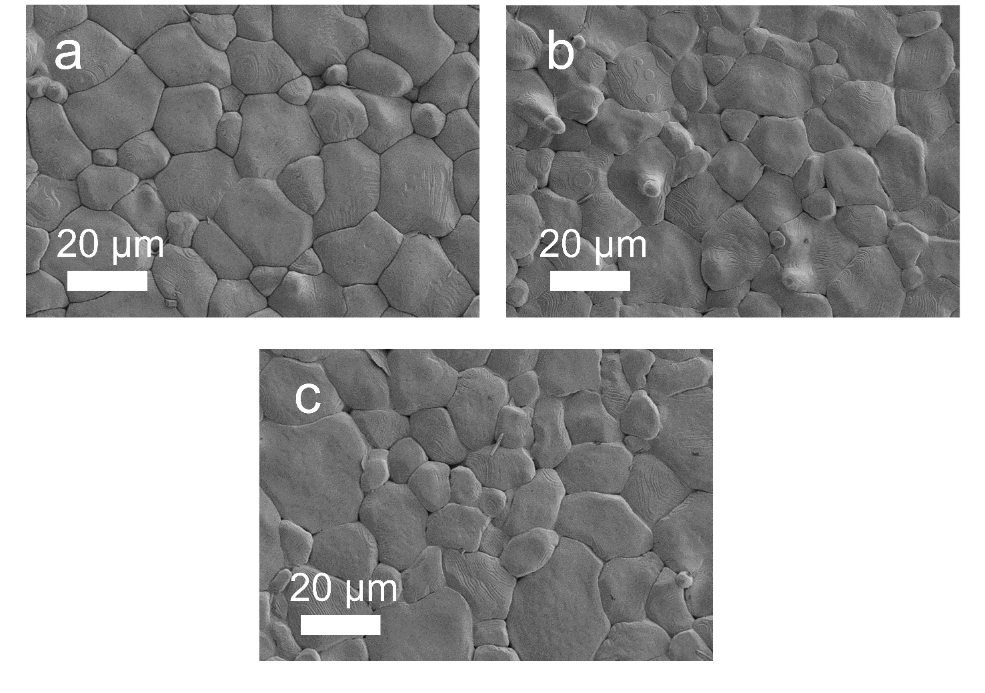


**Supplementary Fig. 20.** The SEM images of BCTZ−*x*AlN−50 ceramics:

(**a**) *x* = 0.25, (**b**) *x* = 1.00, (**c**) *x* = 1.50.


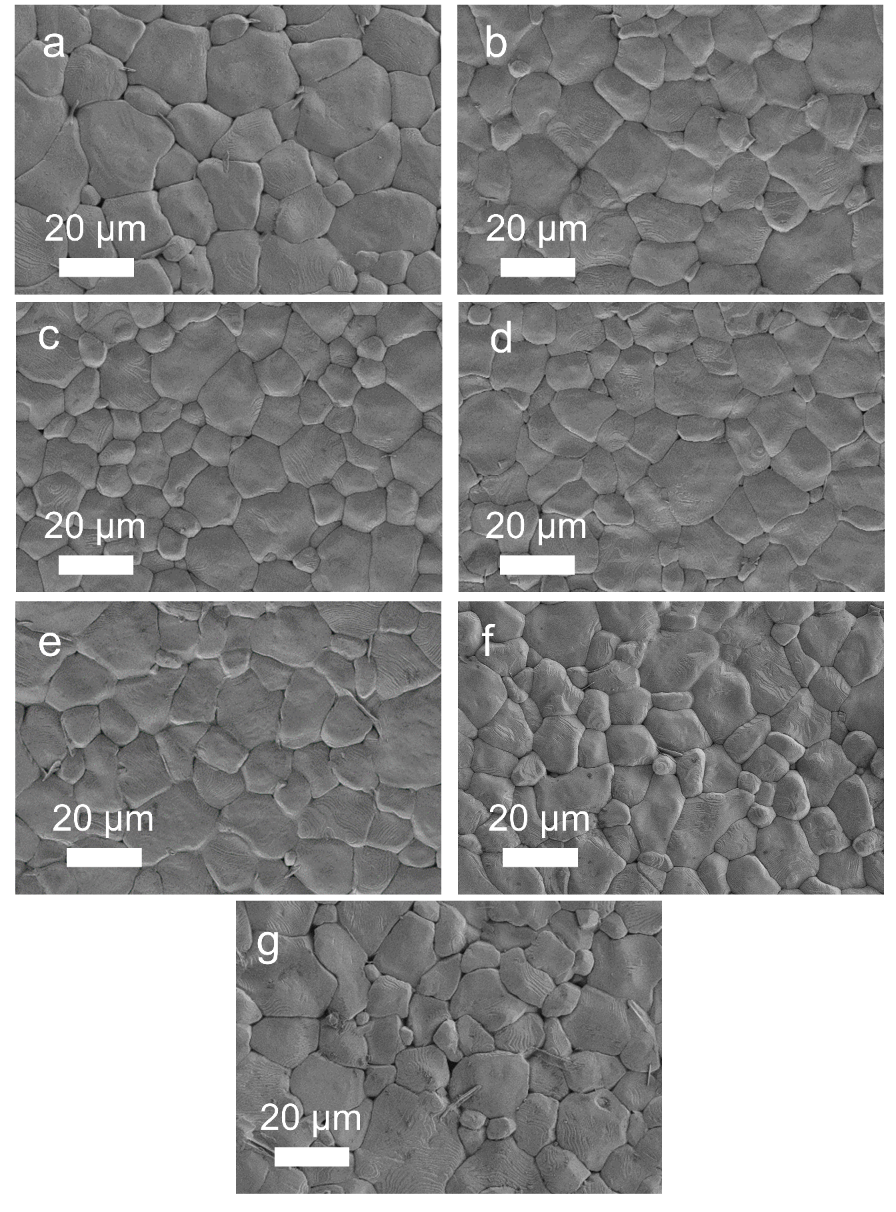


**Supplementary Fig. 21.** The SEM images of BCTZ−*x*AlN−300 ceramics: (**a**) *x* = 0.25, (**b**) *x* = 0.50, (**c**) *x* = 0.75, (**d**) *x* = 1.00, (**e**) *x* = 1.25, (**f**) *x* = 1.50, (**g**) *x* = 2.00.


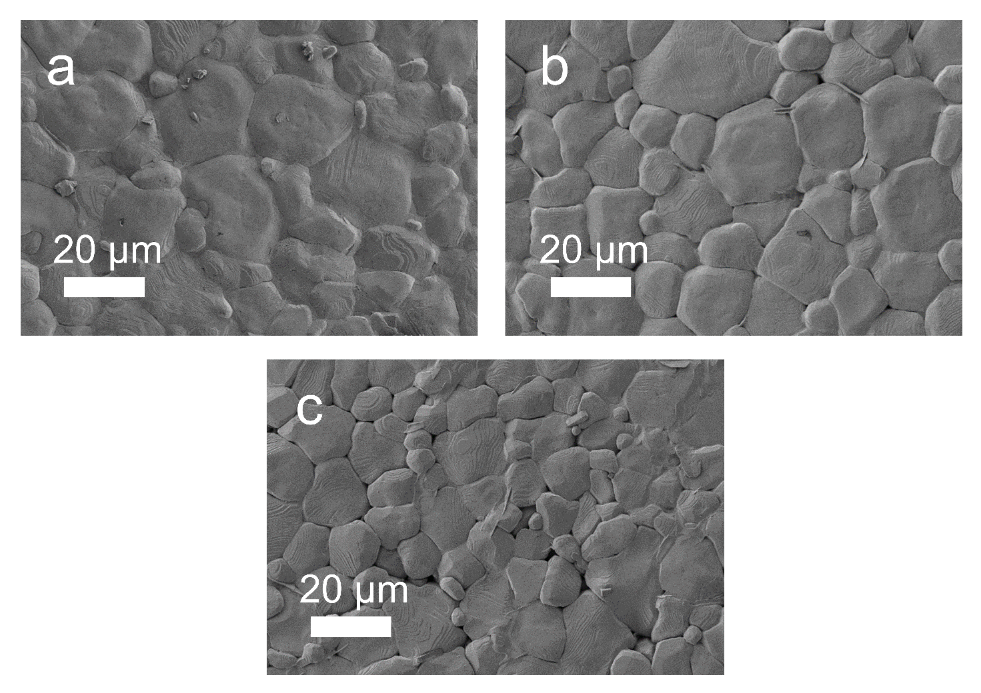


**Supplementary Fig. 22.** The SEM images of BCTZ−*x*AlN−3000 ceramics:

(**a**) *x* = 0.25, (**b**) *x* = 1.00, (**c**) *x* = 1.50.





**Supplementary Fig. 23.** The SEM images and corresponding EDS mapping of BCTZ−1.75AlN−50 ceramics (the yellow-circled area represents BaAl2O4).


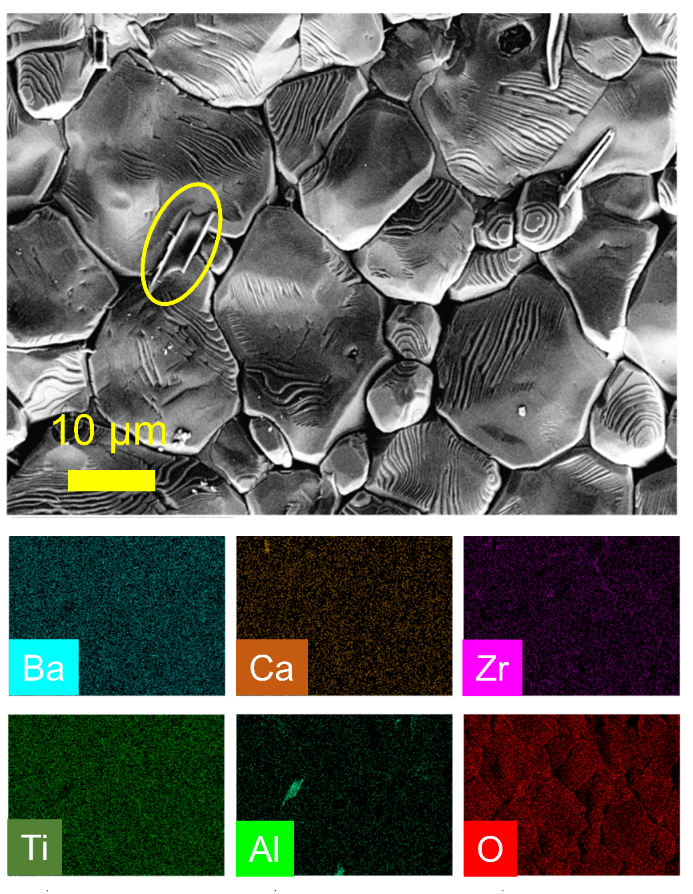


**Supplementary Fig. 24.** The SEM images and corresponding EDS mapping of BCTZ−1.75AlN−300 ceramics (the yellow-circled area represents BaAl2O4).


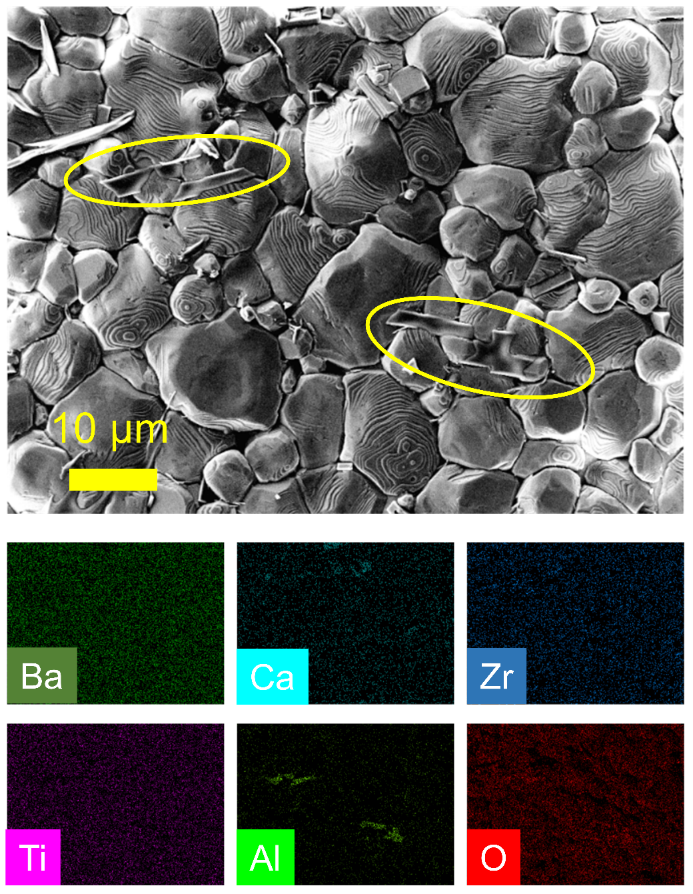


**Supplementary Fig. 25.** The SEM images and corresponding EDS mapping of BCTZ−1.75AlN−3000 ceramics (the yellow-circled area represents BaAl2O4).


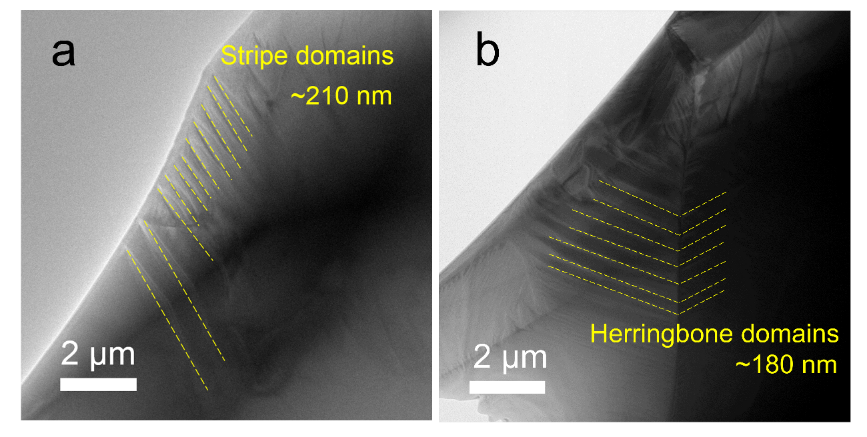


**Supplementary Fig. 26.** TEM images of (**a**) BCTZ and (**b**) BCTZ−1.75AlN−300 ceramic.


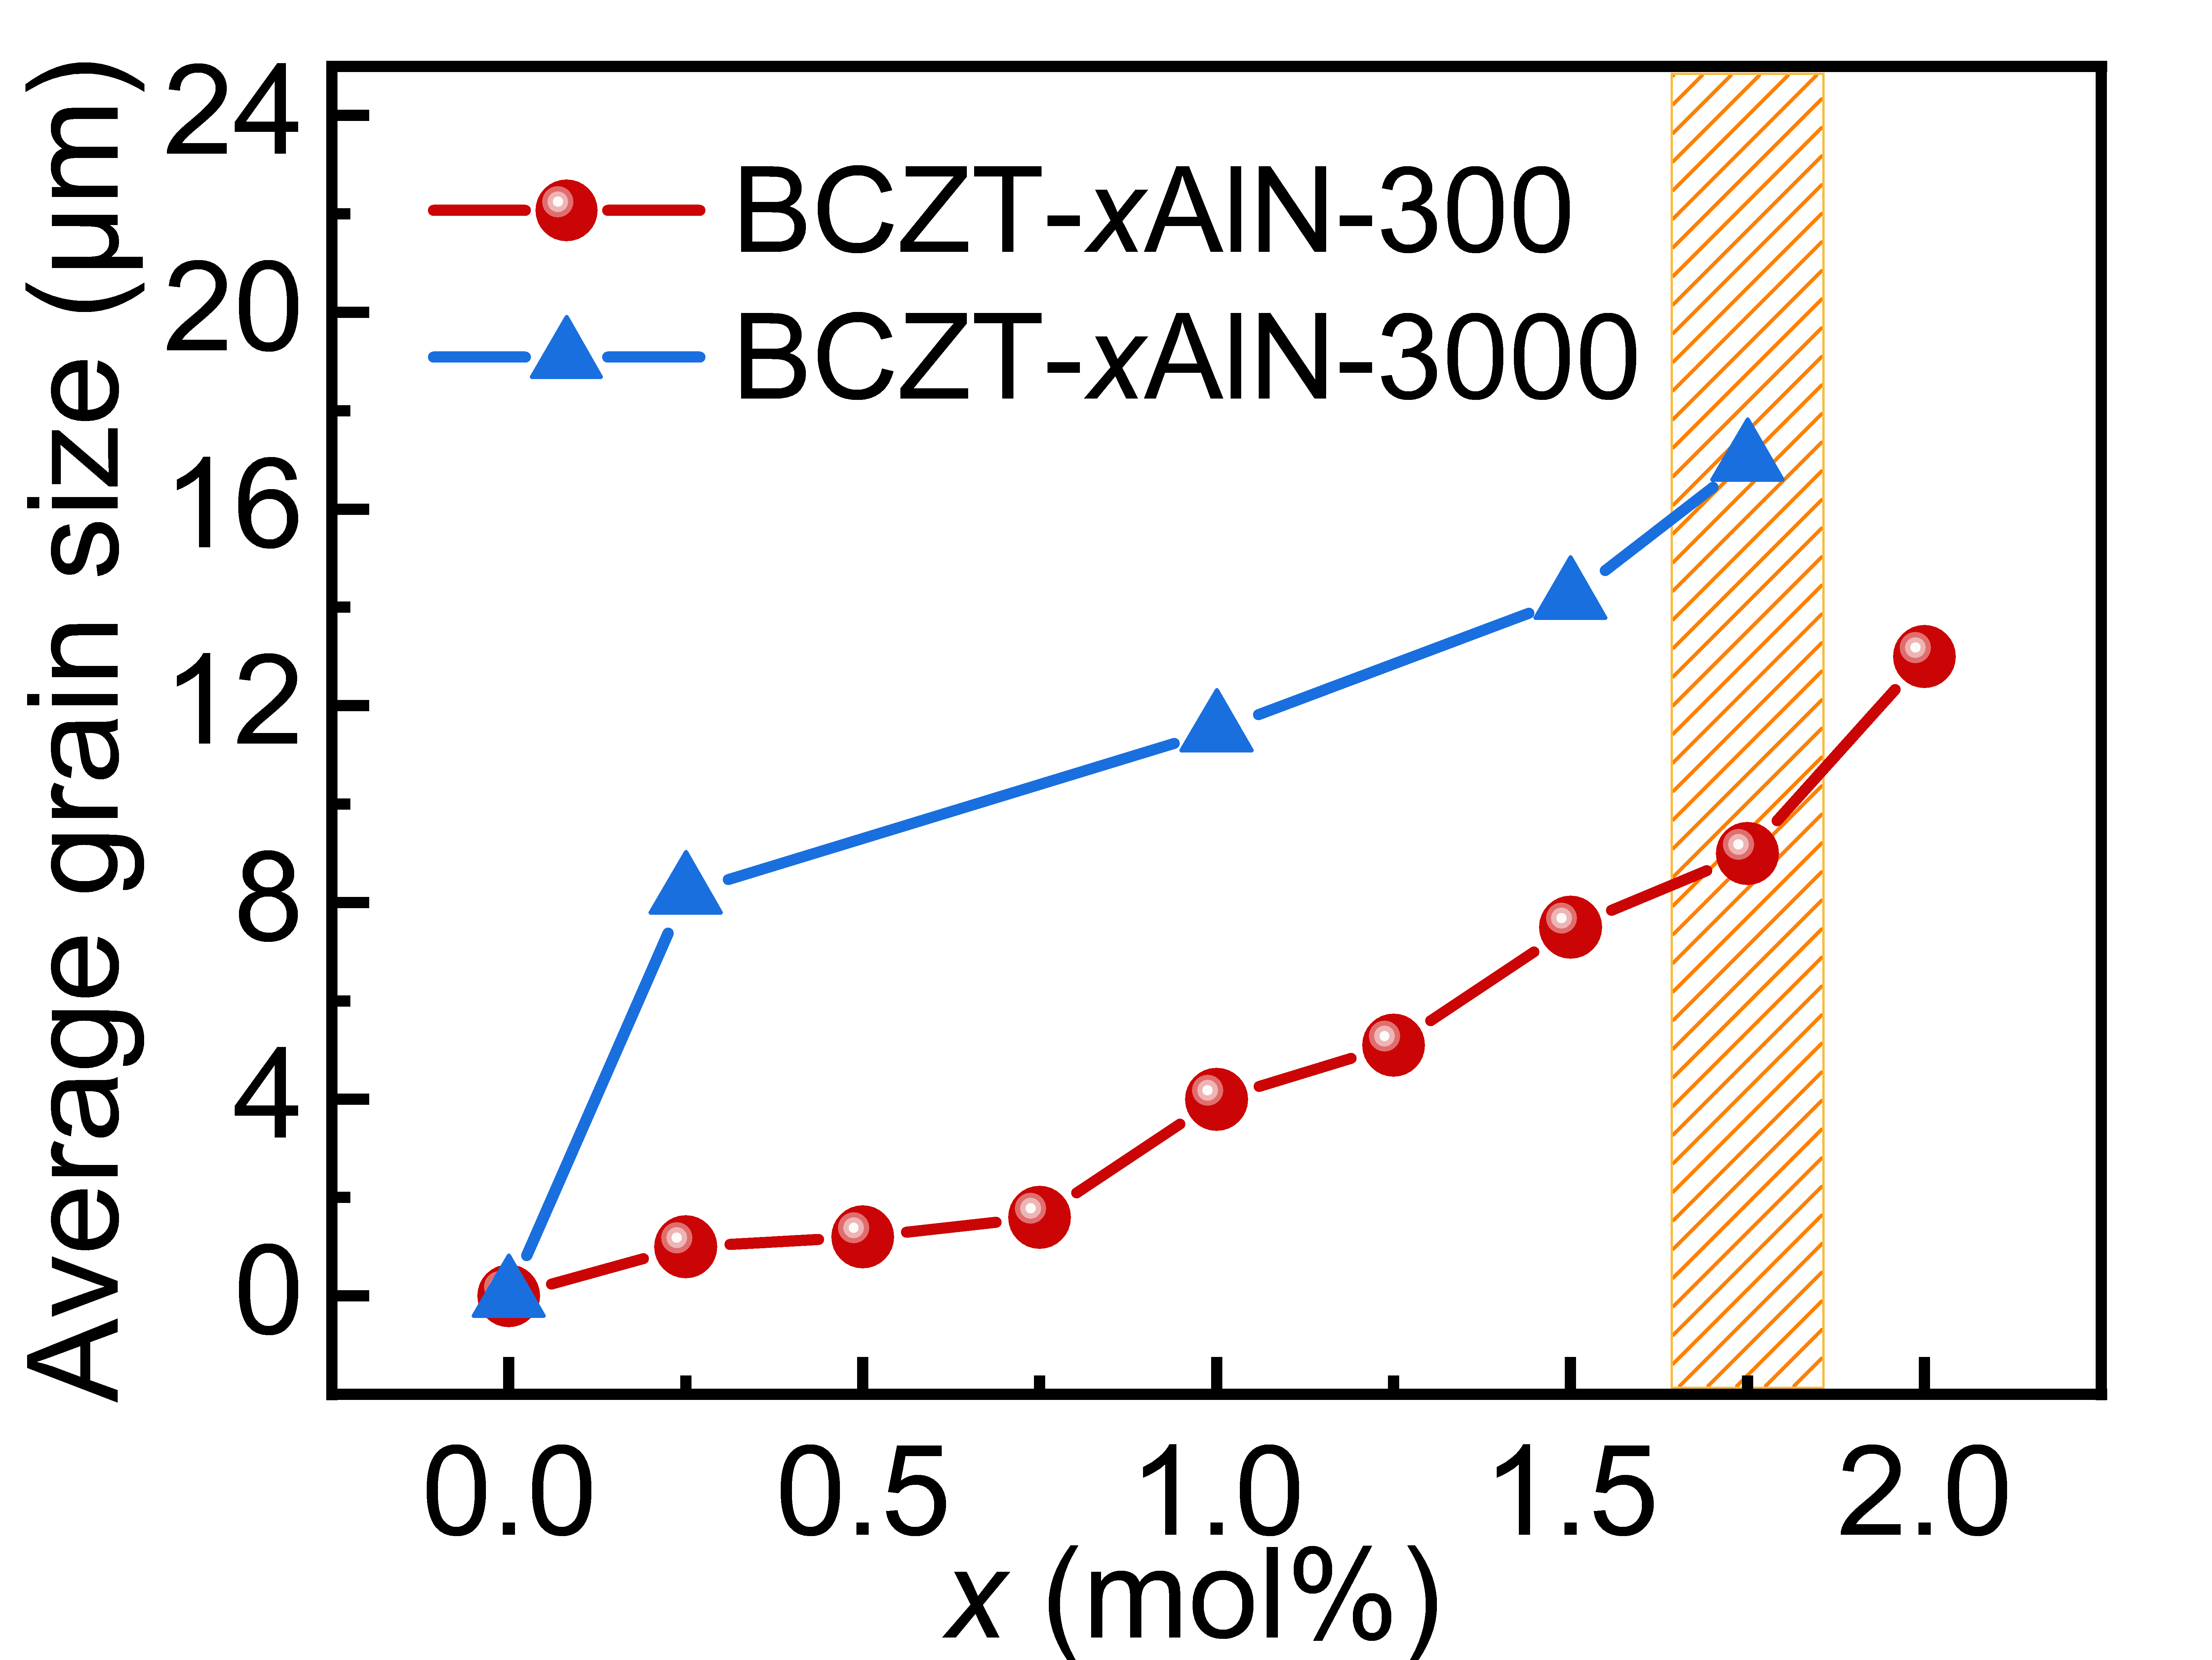


**Supplementary Fig. 27.** The average grain size of BaAl2O4 in the BCTZ–*x*AlN–300 and BCTZ–*x*AlN–3000 ceramics.


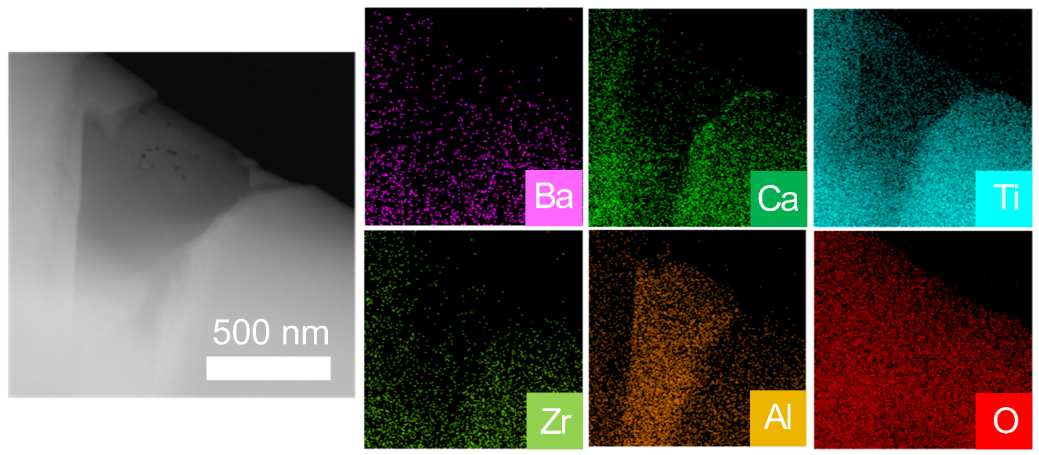


**Supplementary Fig. 28.** EDS mapping images of Ba, Ca, Ti, Zr, Al, and O elemental distribution in BCTZ−1.75AlN−300 ceramic.


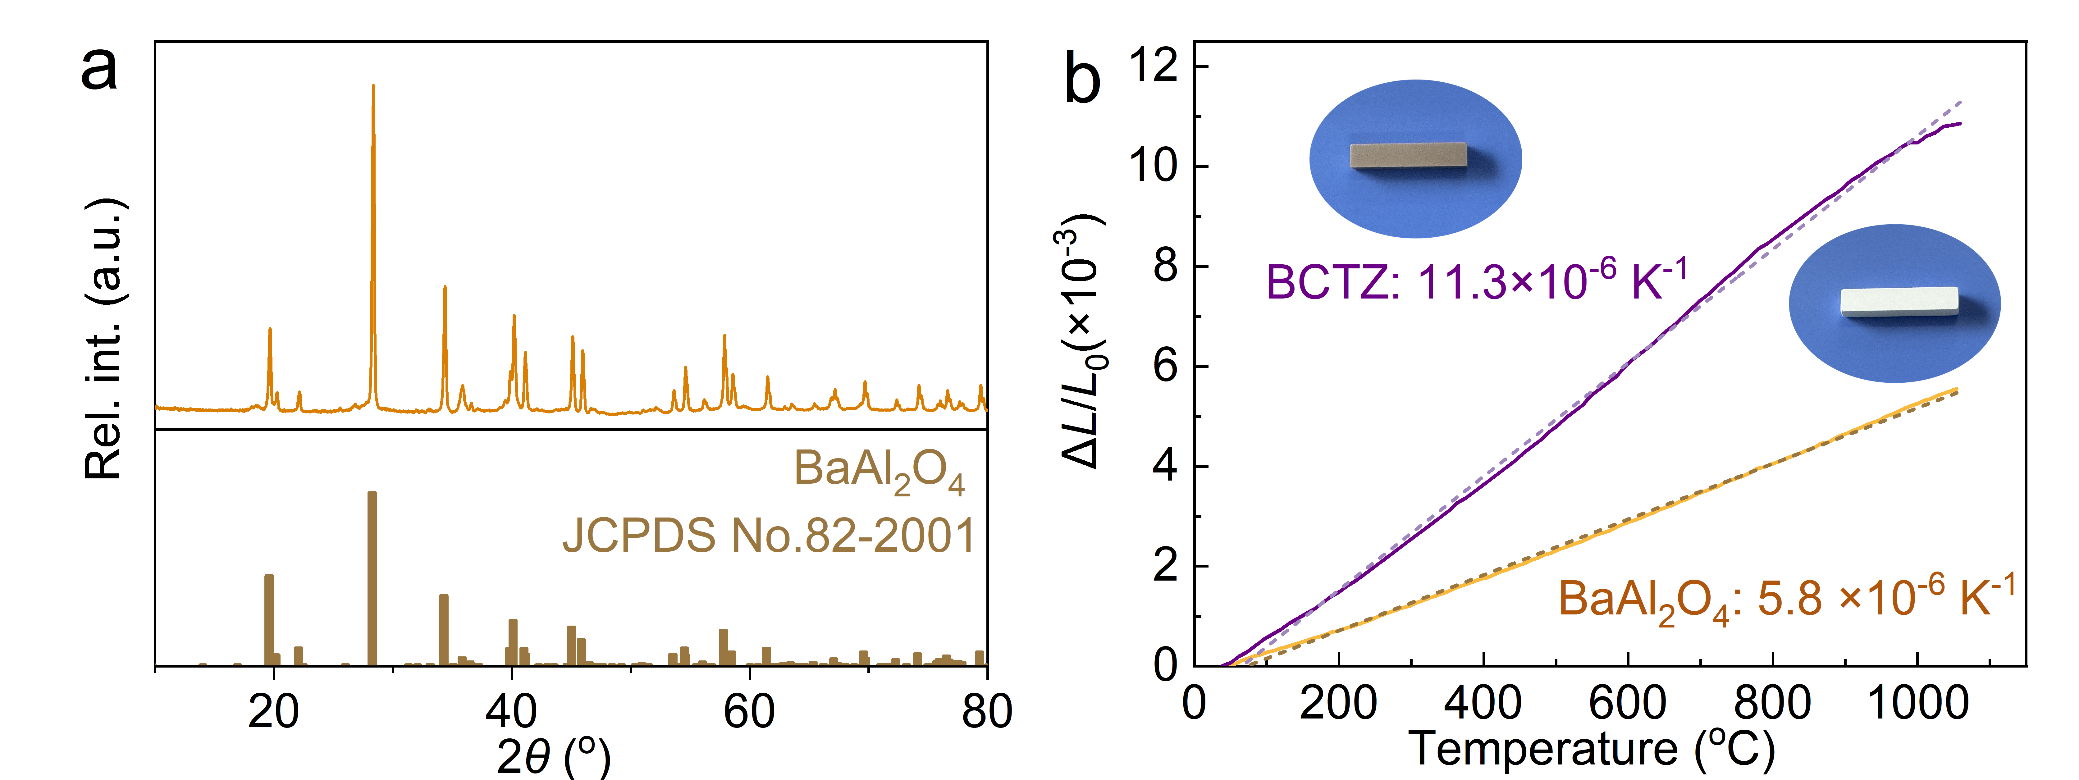


**Supplementary Fig. 29.** **a** The XRD pattern of BaAl2O4 ceramic. **b** Average relative expansion and thermal expansion coefficients of sintered BCTZ and BaAl2O4 ceramics. Insets are the photographs of BCTZ (right) and BaAl2O4 (left) ceramics.


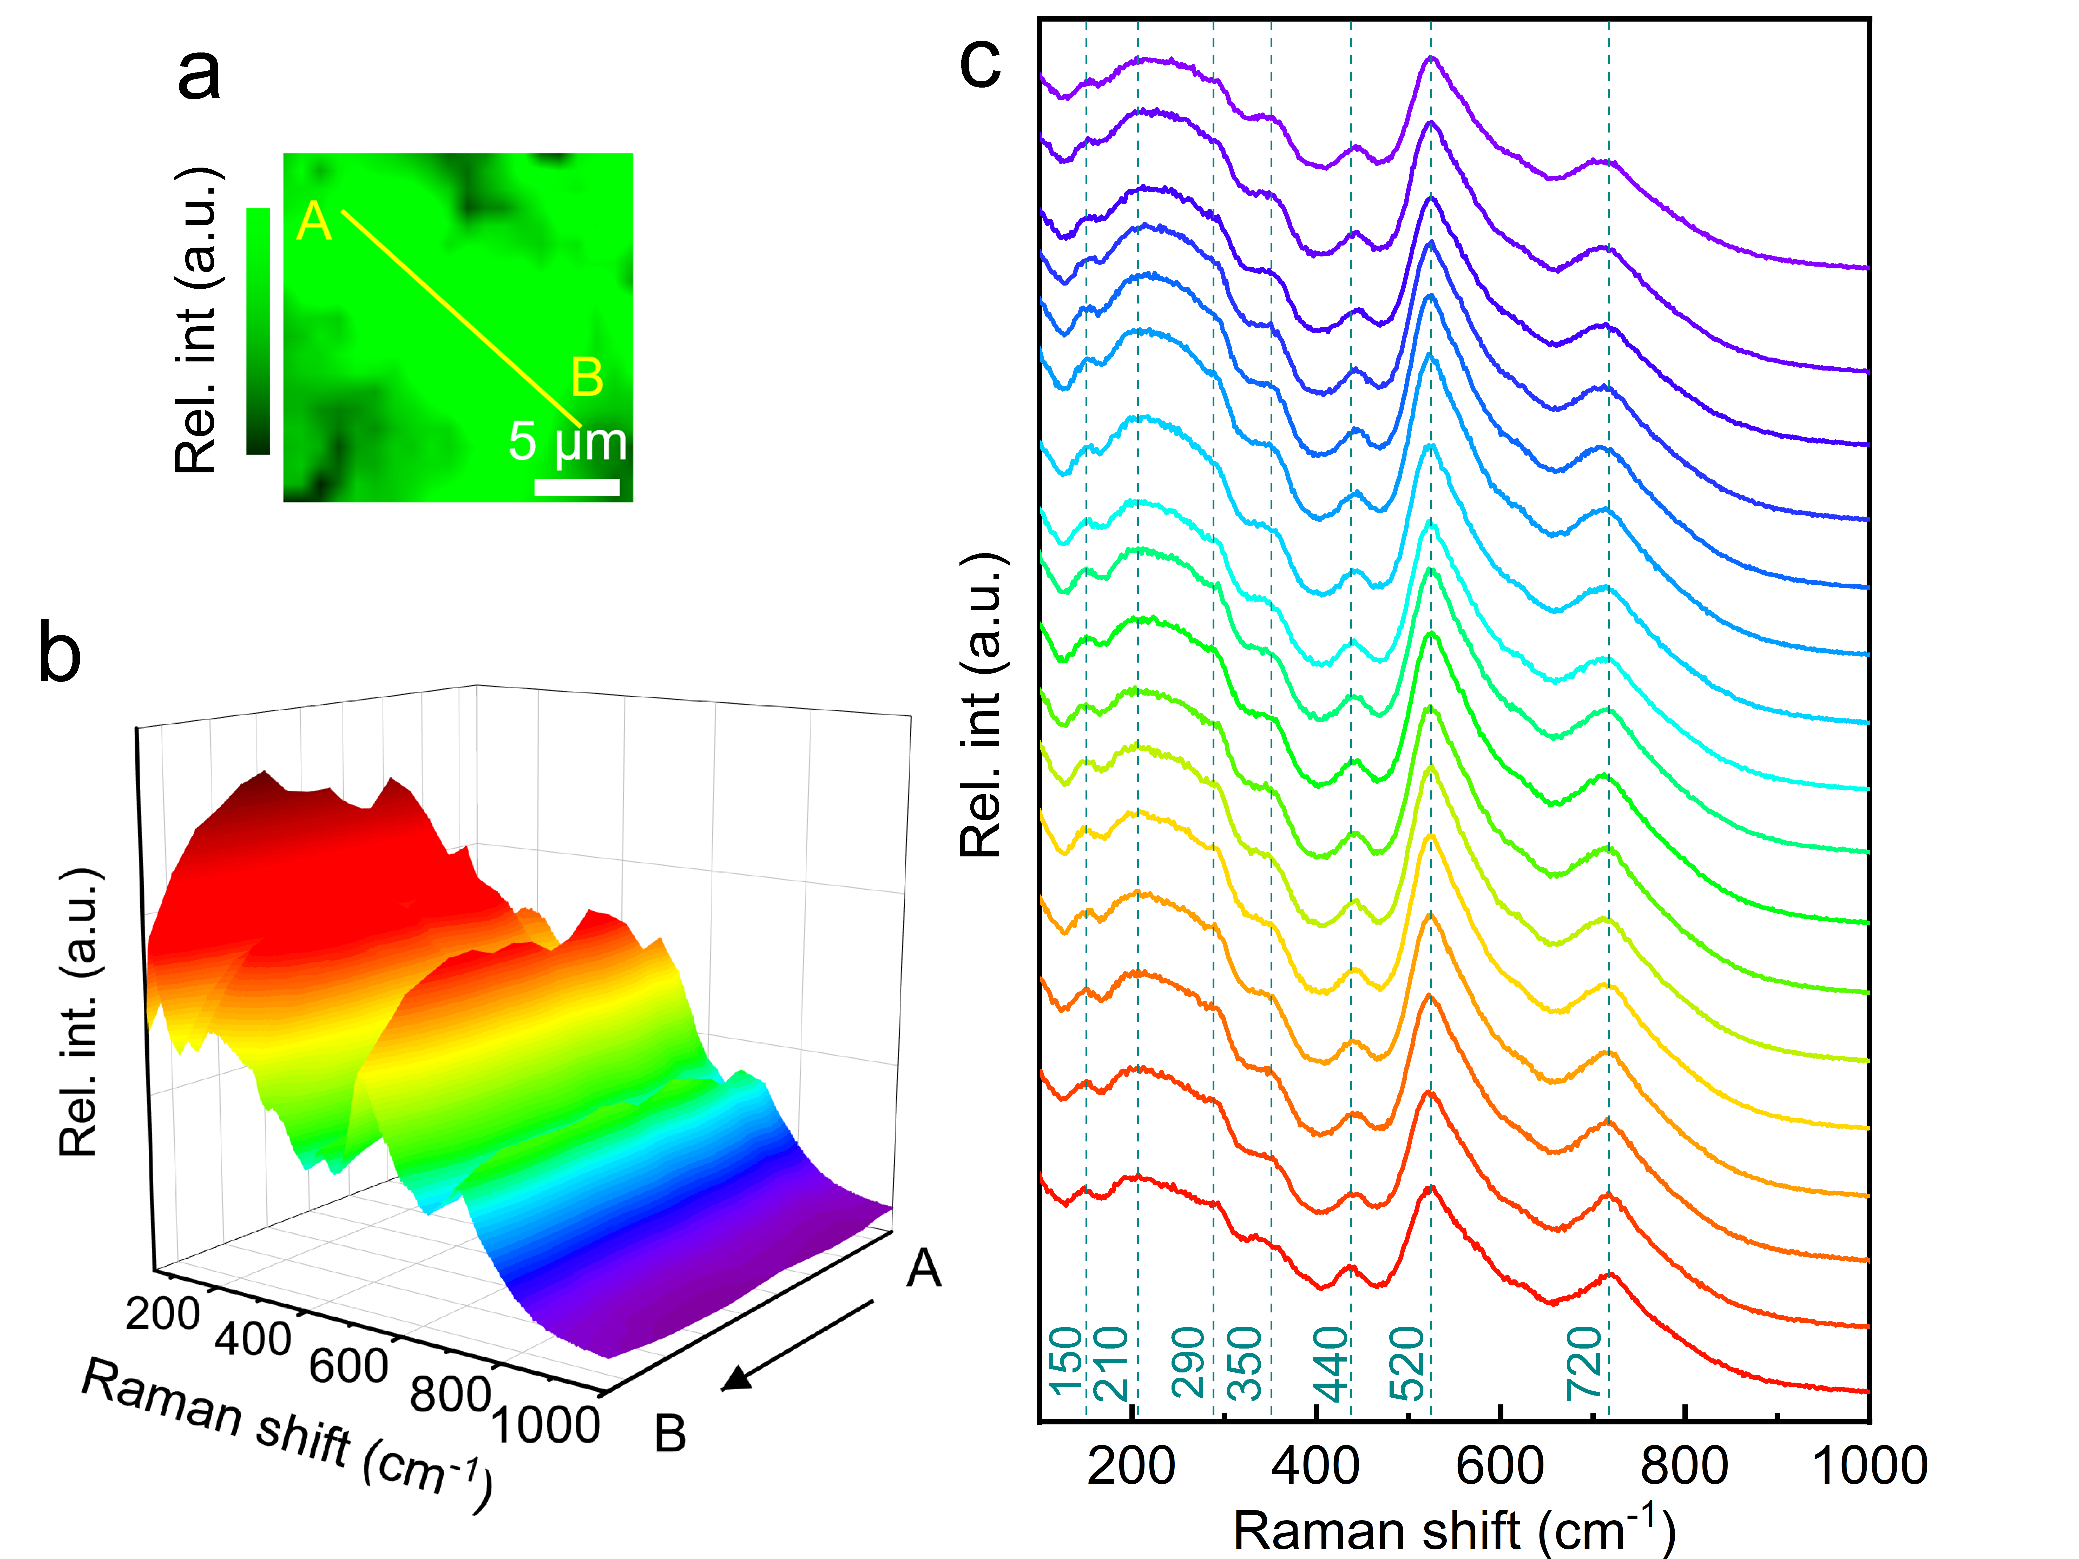


**Supplementary Fig. 30.** **a** Raman mapping images of BCTZ ceramic integrating with the bands of 523 cm−1. **b** 3D stereo plot of specific Raman spectra from points A to B of BCTZ ceramic and (**c**) corresponding line plot.


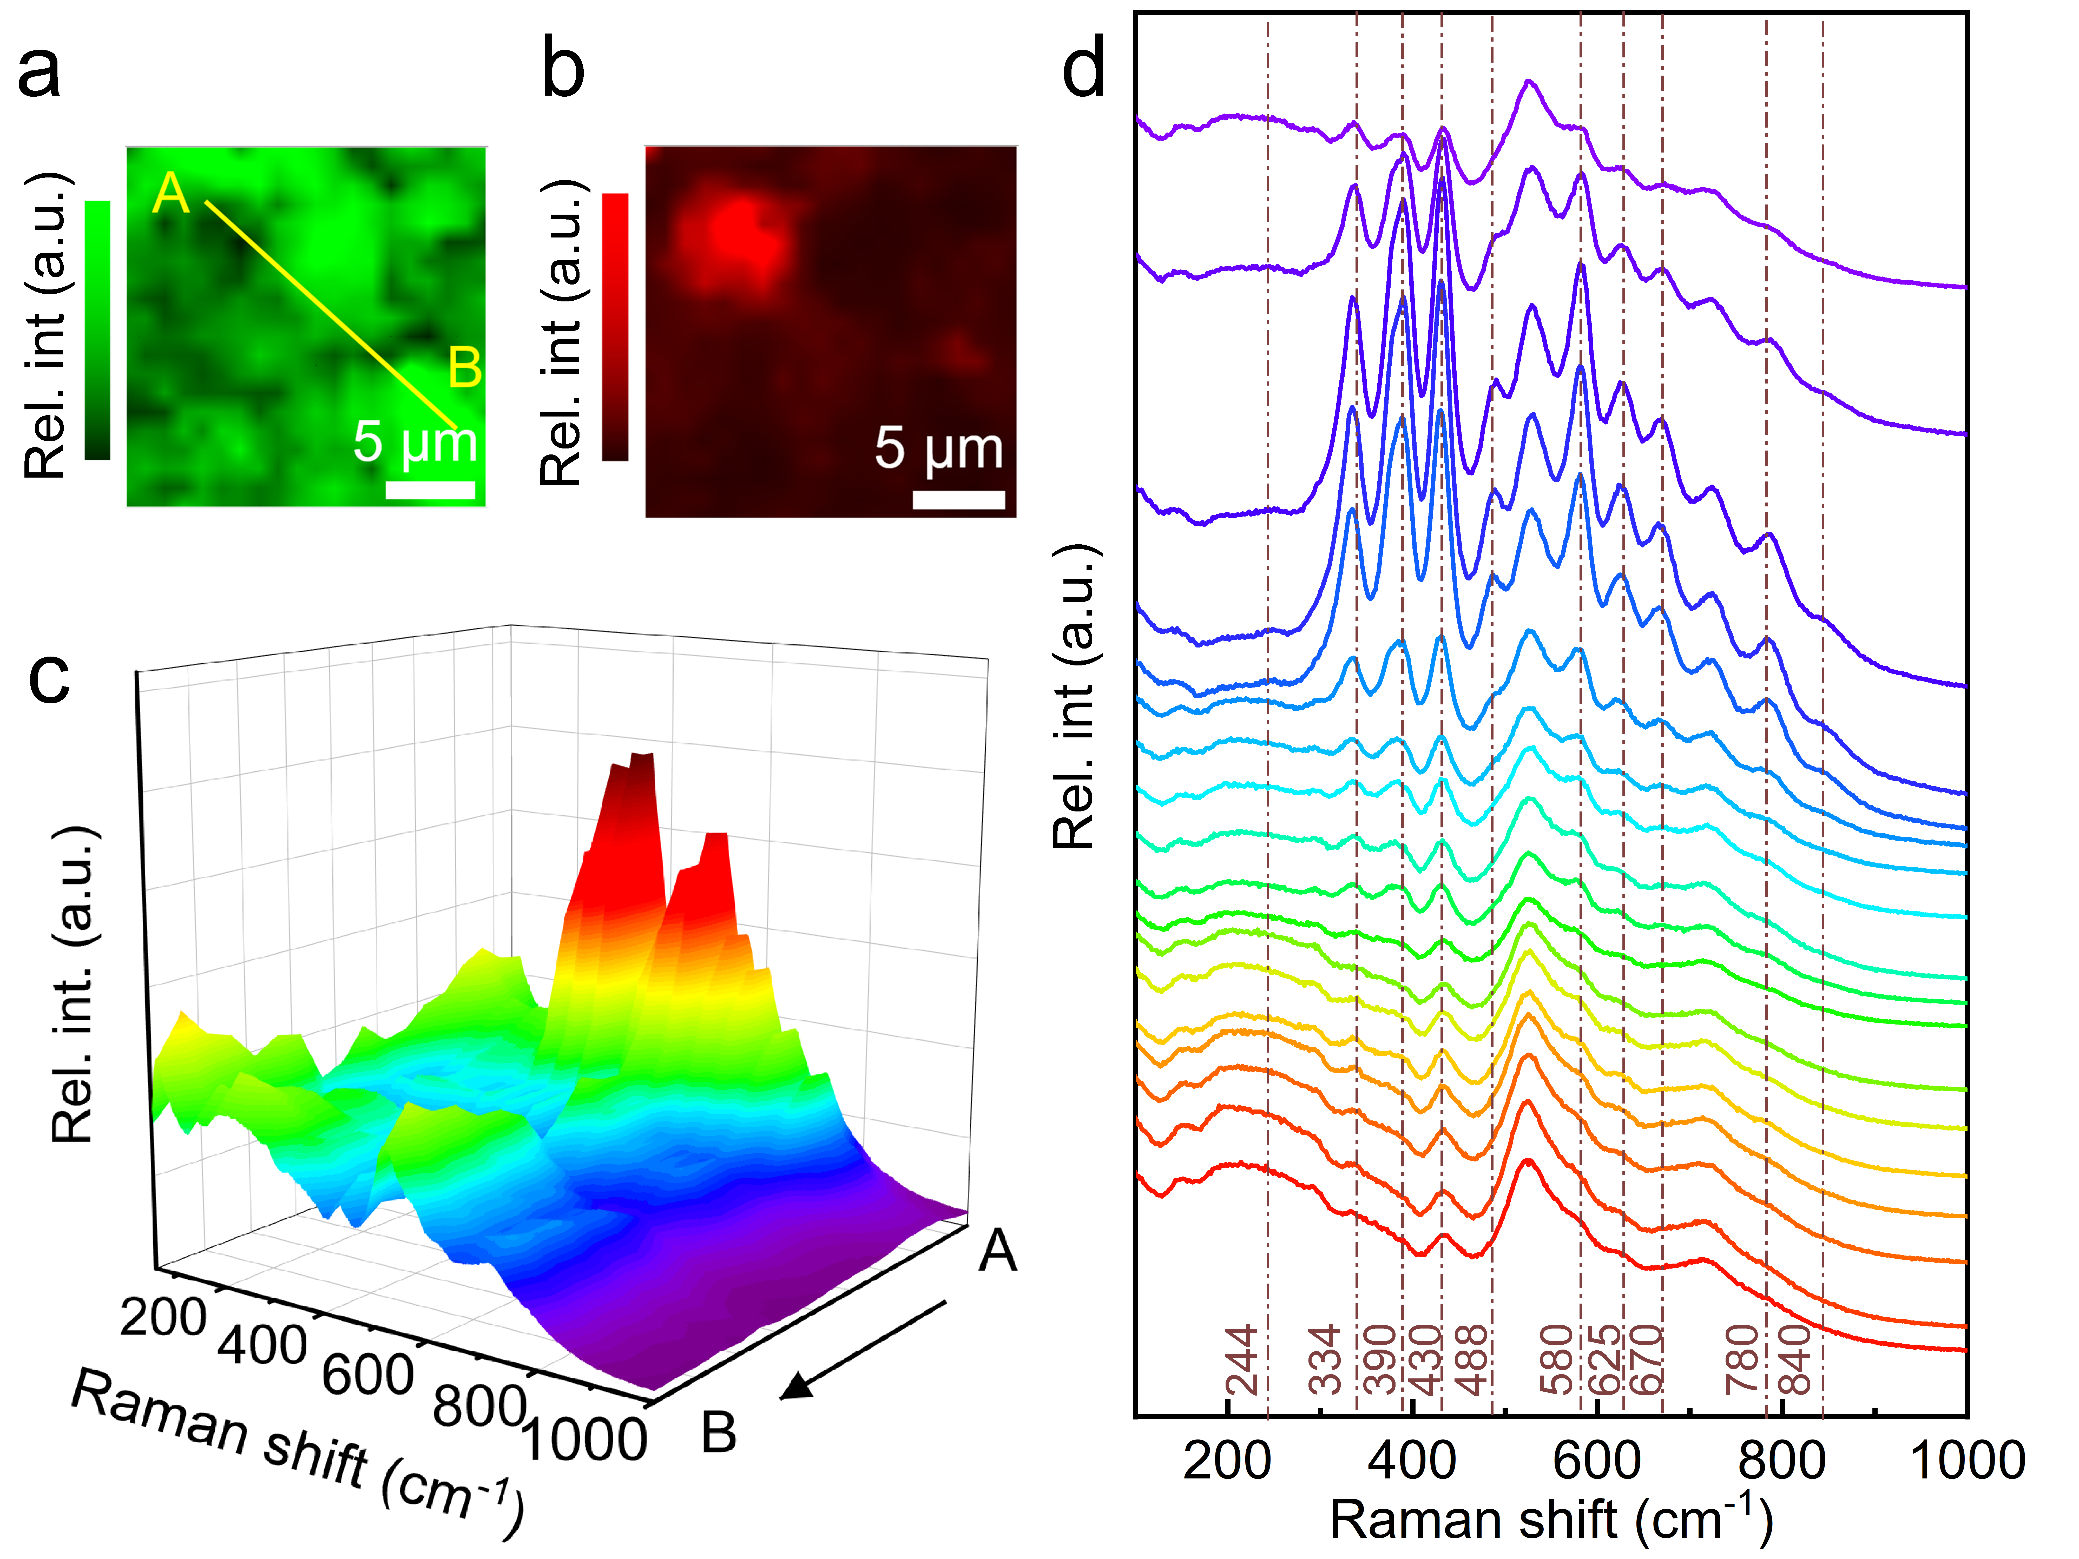


**Supplementary Fig. 31.** Raman mapping images of BCTZ−1.75AlN−300 ceramic integrating with the bands of (**a**) 523 cm−1 and (**b**) 390 cm−1. **c** 3D stereo plot of specific Raman spectra from points A to B of BCTZ−1.75AlN−300 ceramic and (**d**) corresponding line plot.


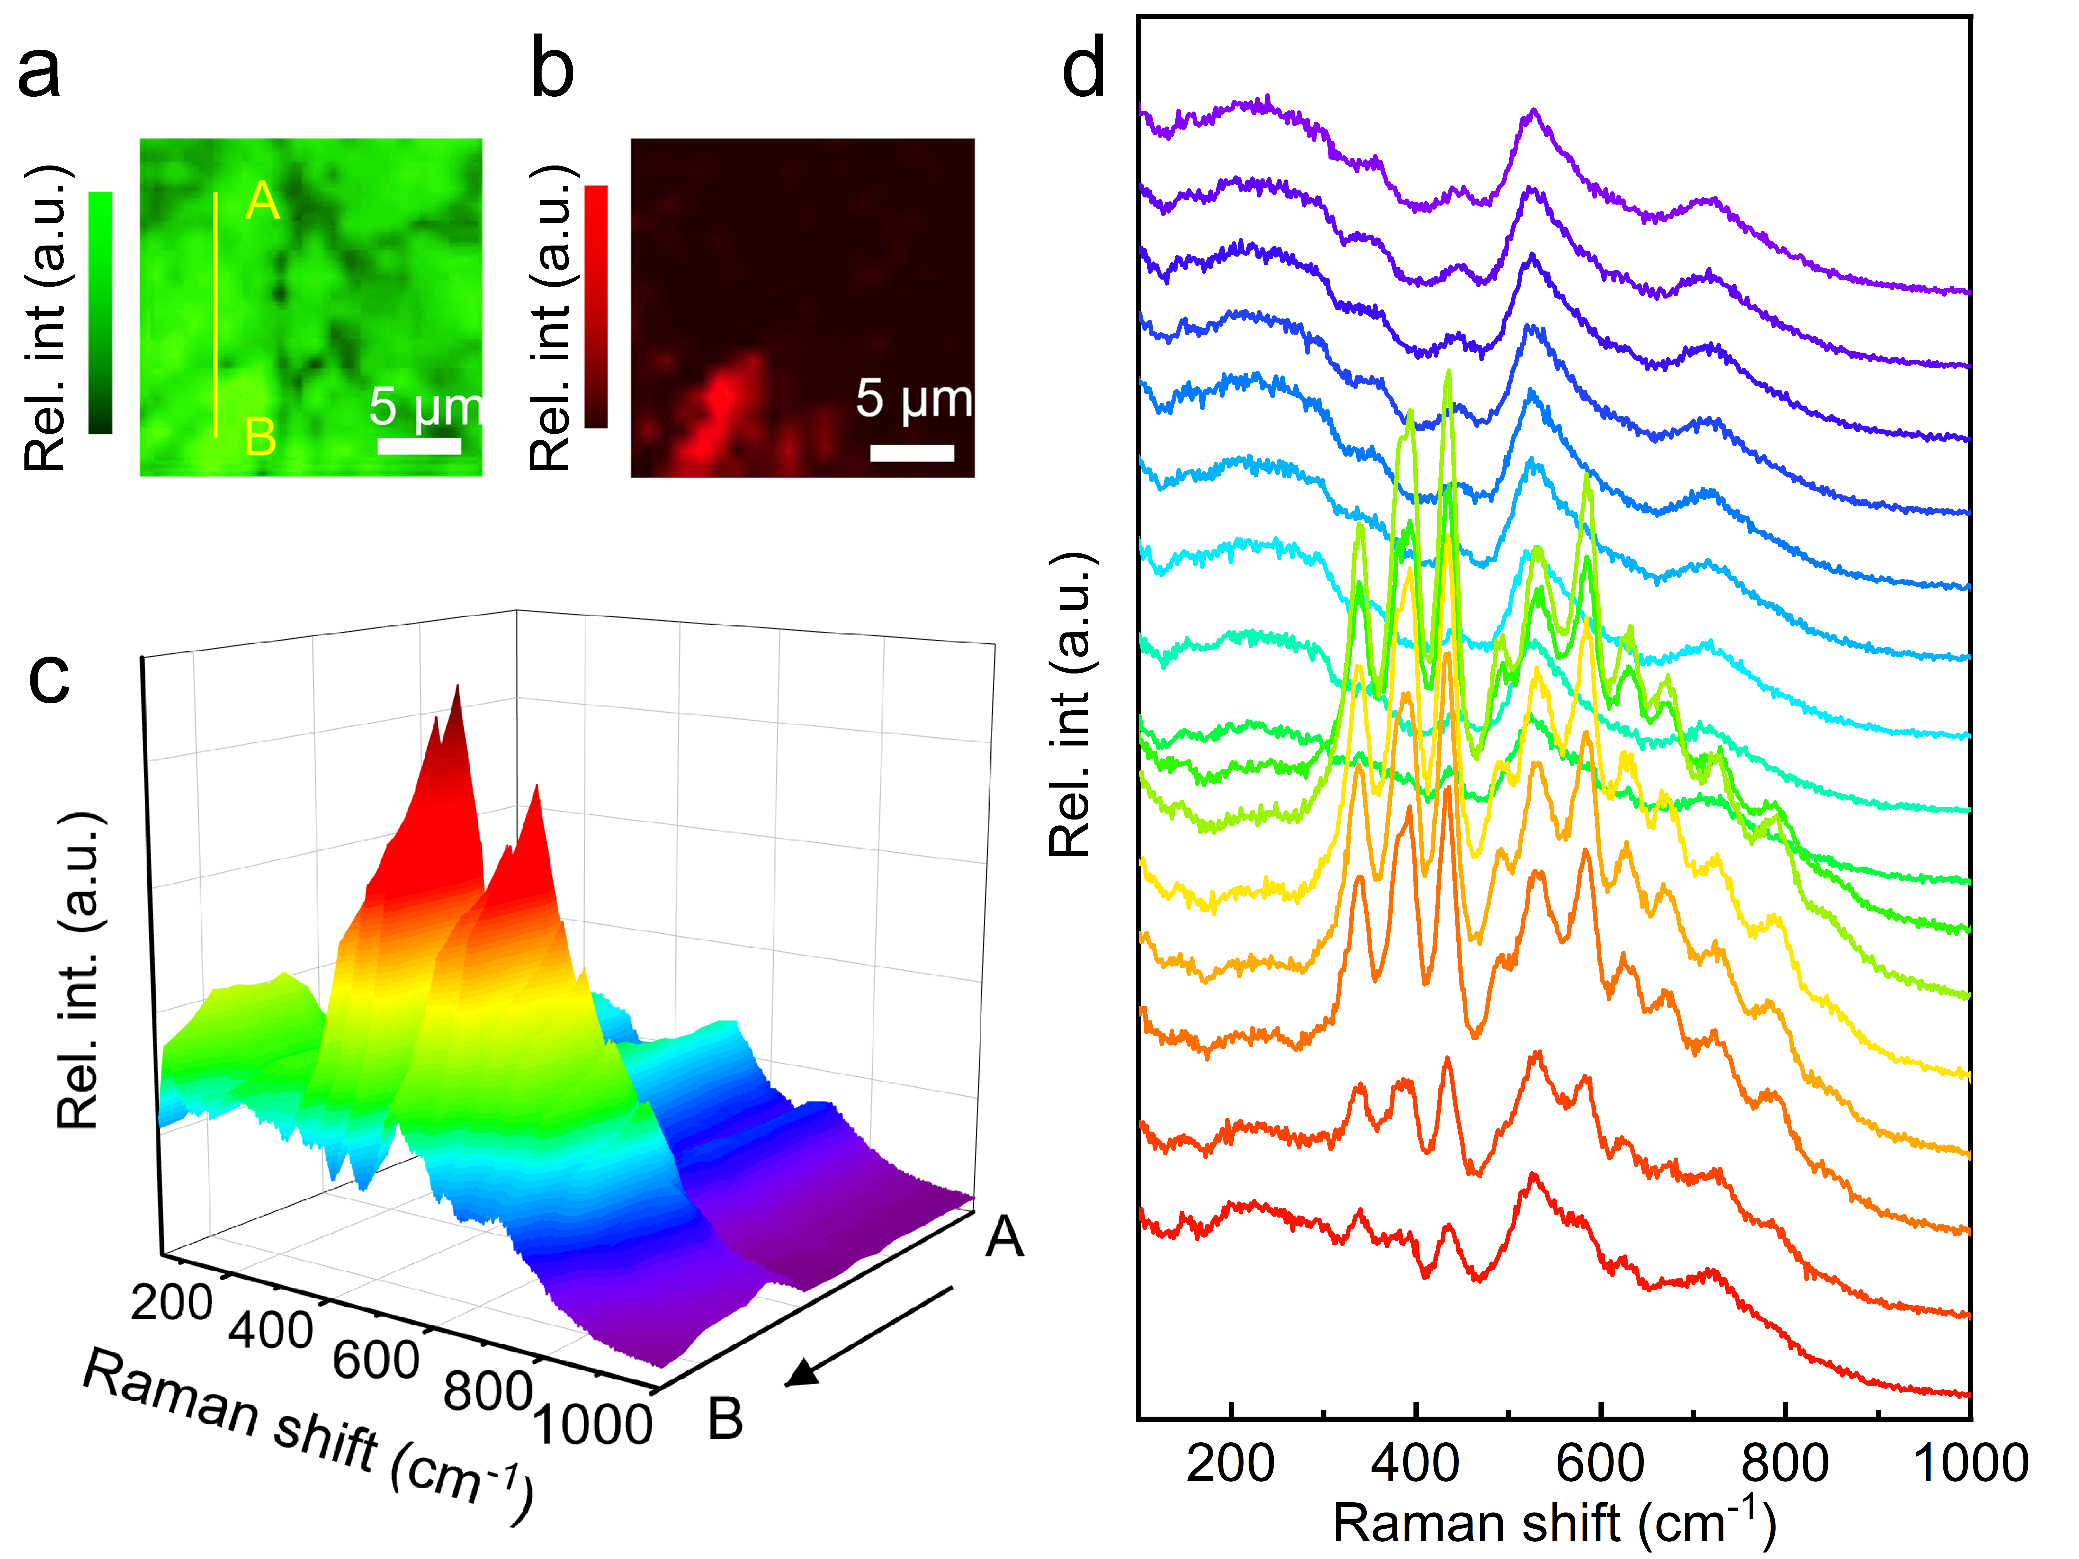


**Supplementary Fig. 32.** Raman mapping images of BCTZ−1.75AlN−3000 ceramic integrating with the bands of (**a**) 523 cm−1 and (**b**) 390 cm−1. **c** 3D stereo plot of specific Raman spectra from points A to B of BCTZ−1.75AlN−3000 ceramic and (**d**) corresponding line plot.


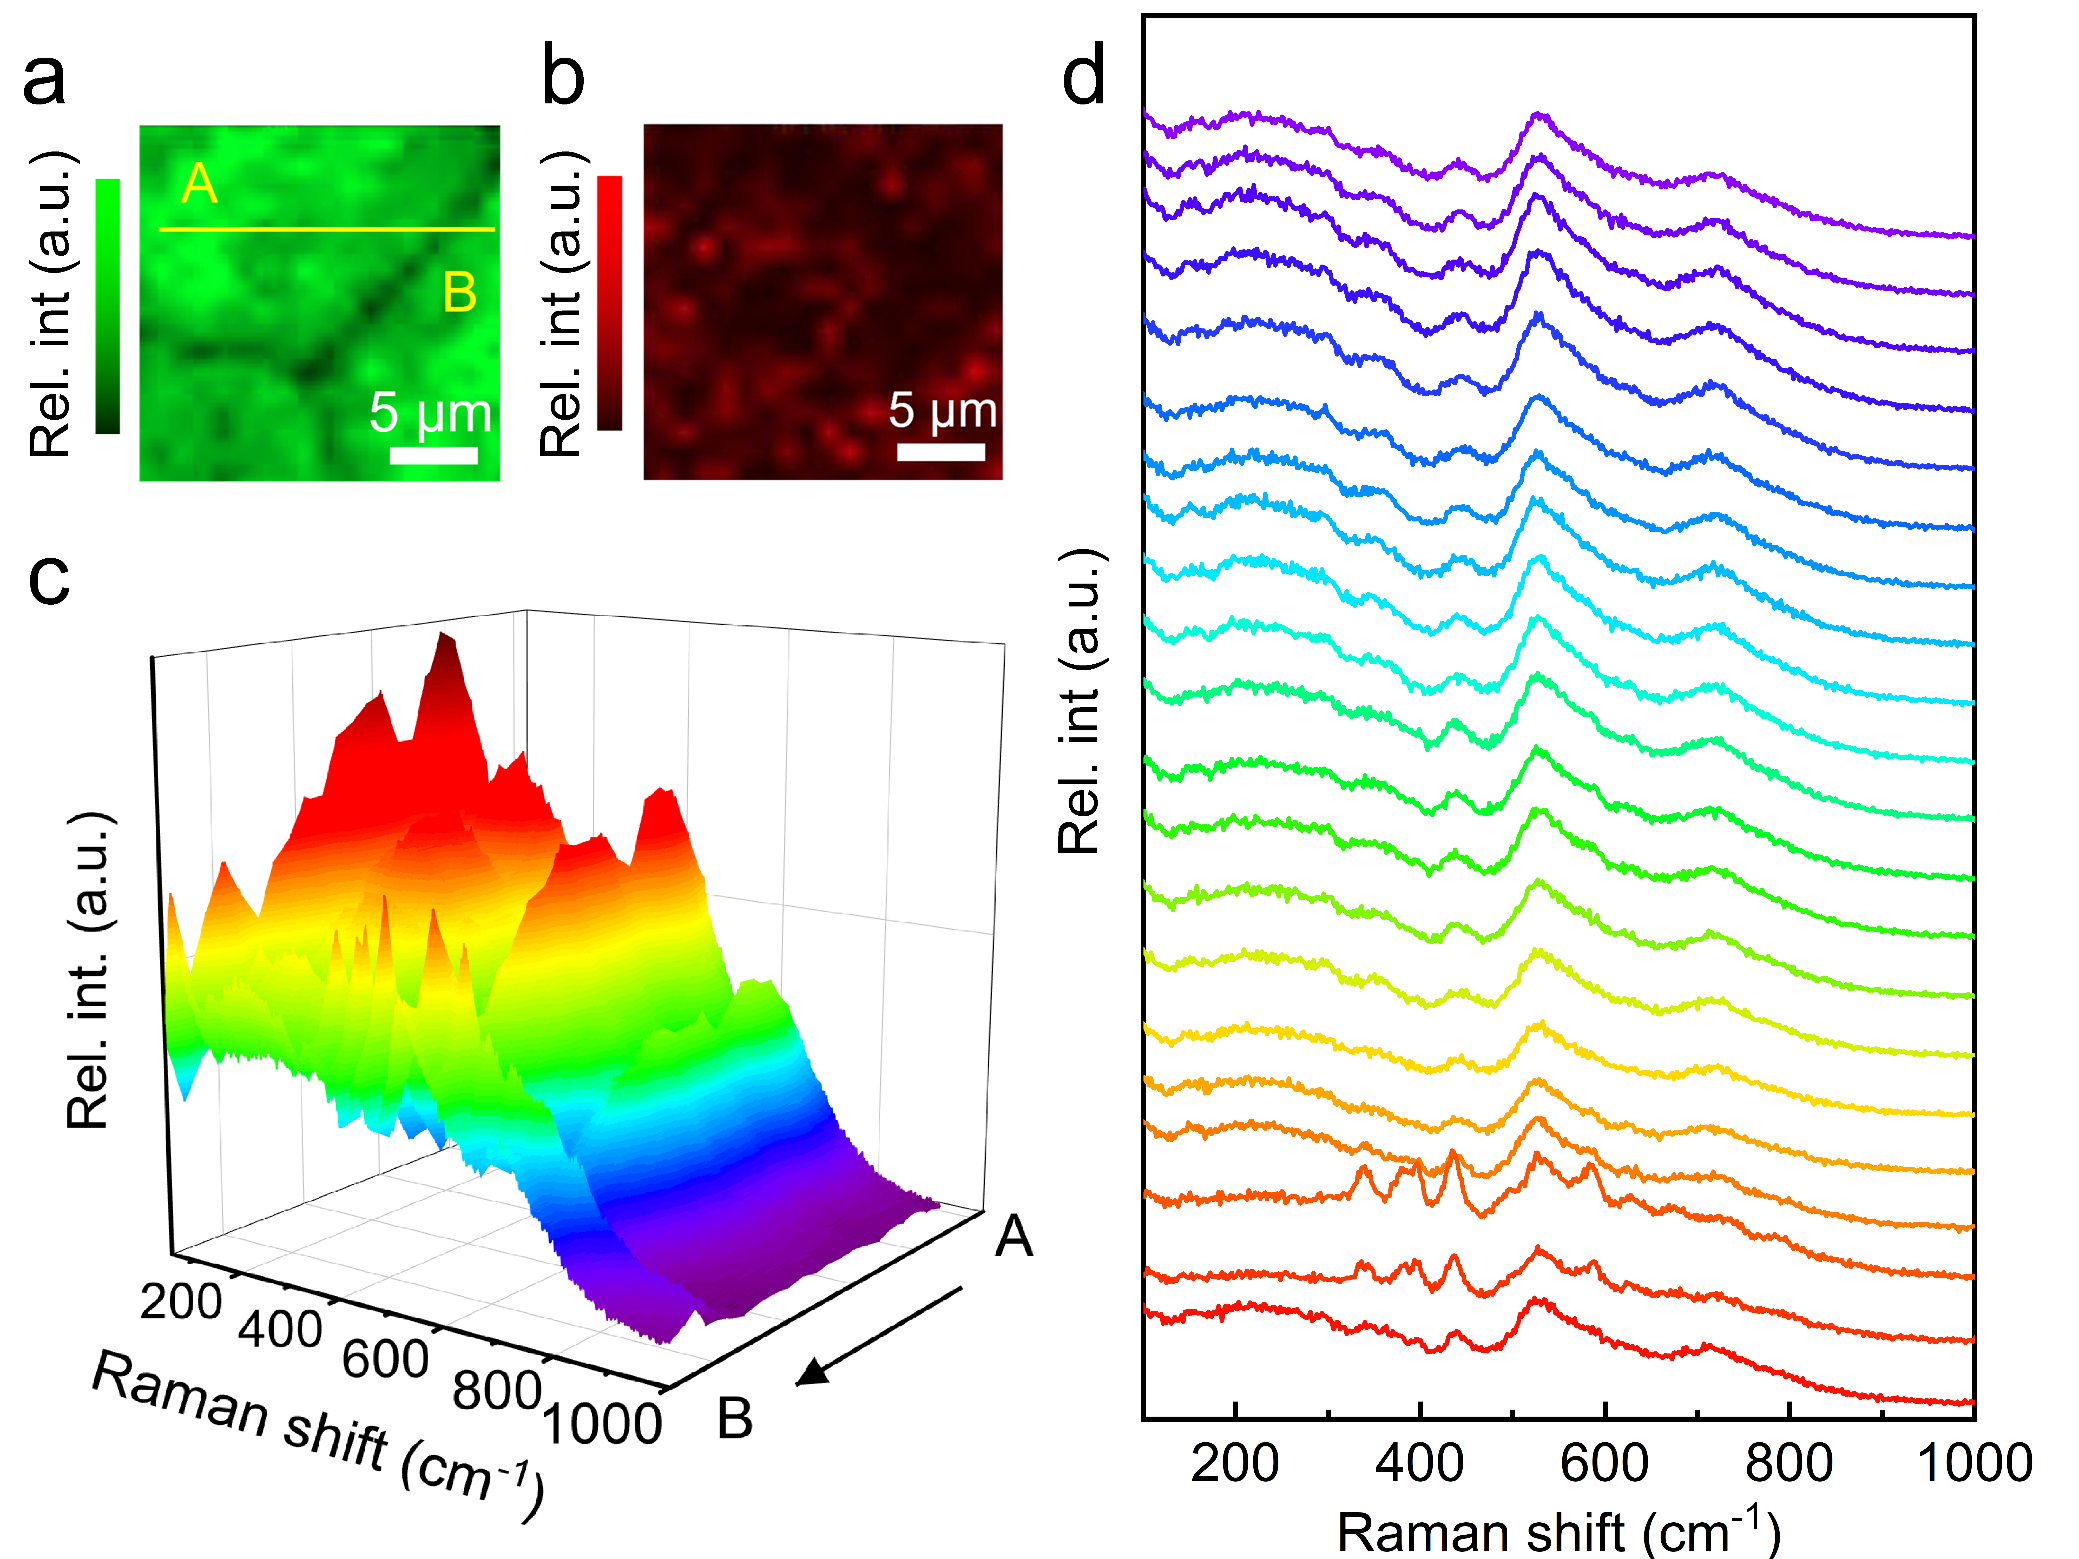


**Supplementary Fig. 33.** Raman mapping images of BCTZ−1.75AlN−50 ceramic integrating with the bands of (**a**) 523 cm−1 and (**b**) 390 cm−1. **c** 3D stereo plot of specific Raman spectra from points A to B of BCTZ−1.75AlN−50 ceramic and (**d**) corresponding line plot.


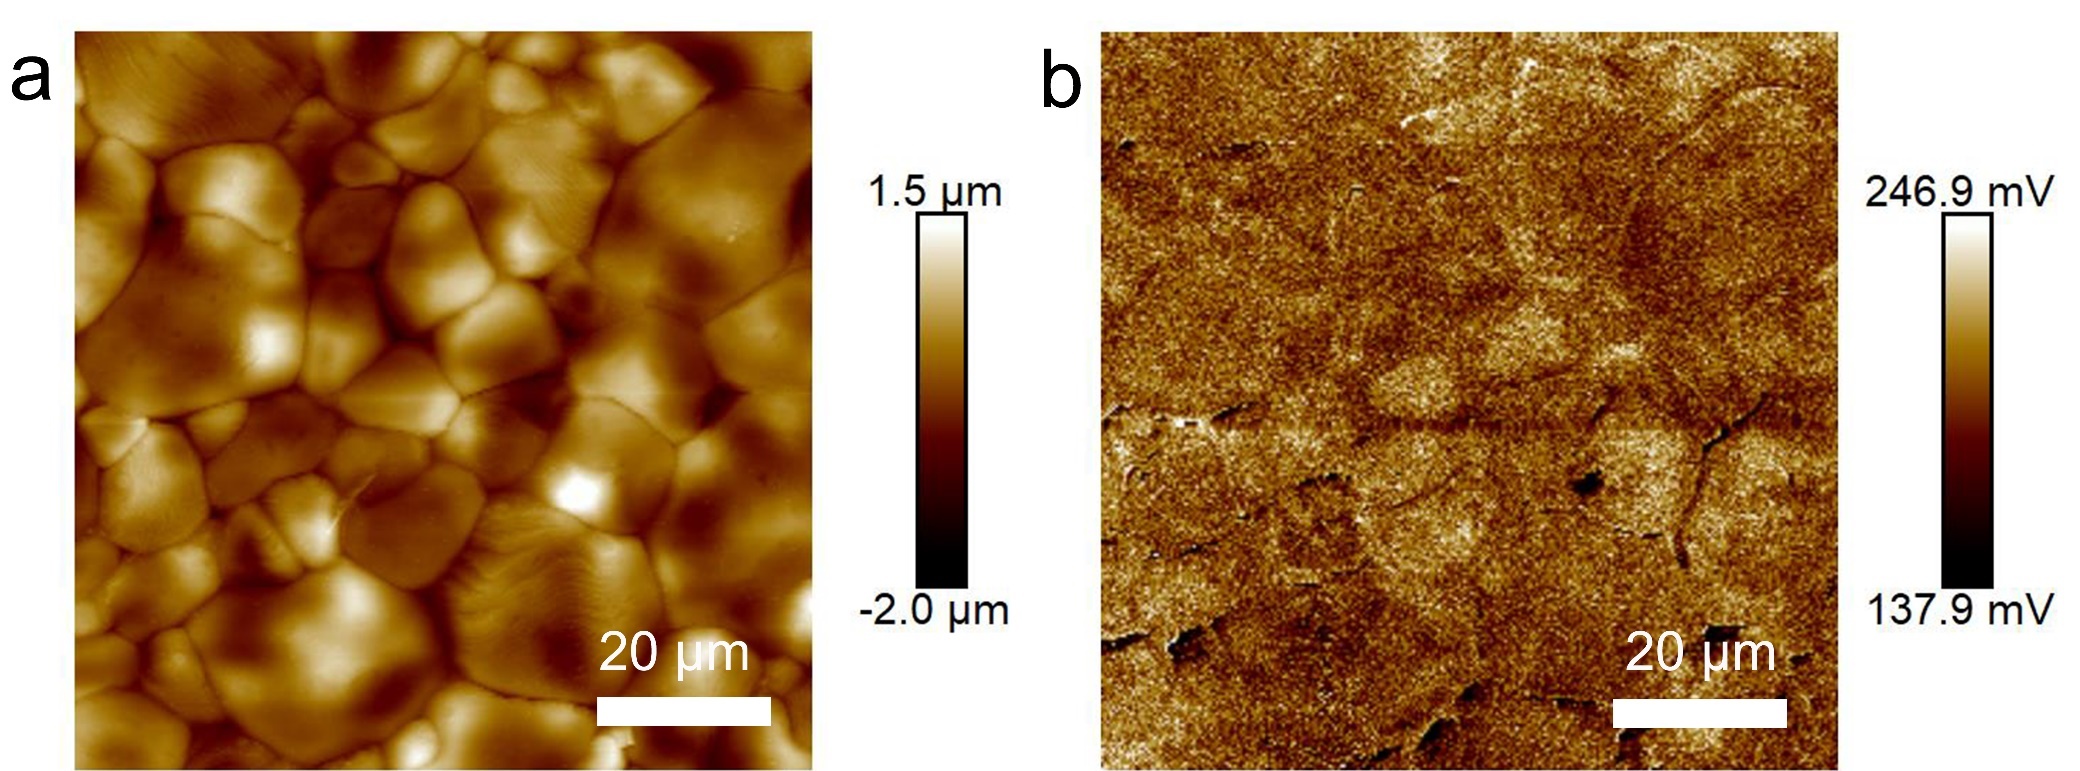


**Supplementary Fig. 34. a** Topographies and (**b**) surface potential mapping of BCTZ ceramics measured using KPFM.


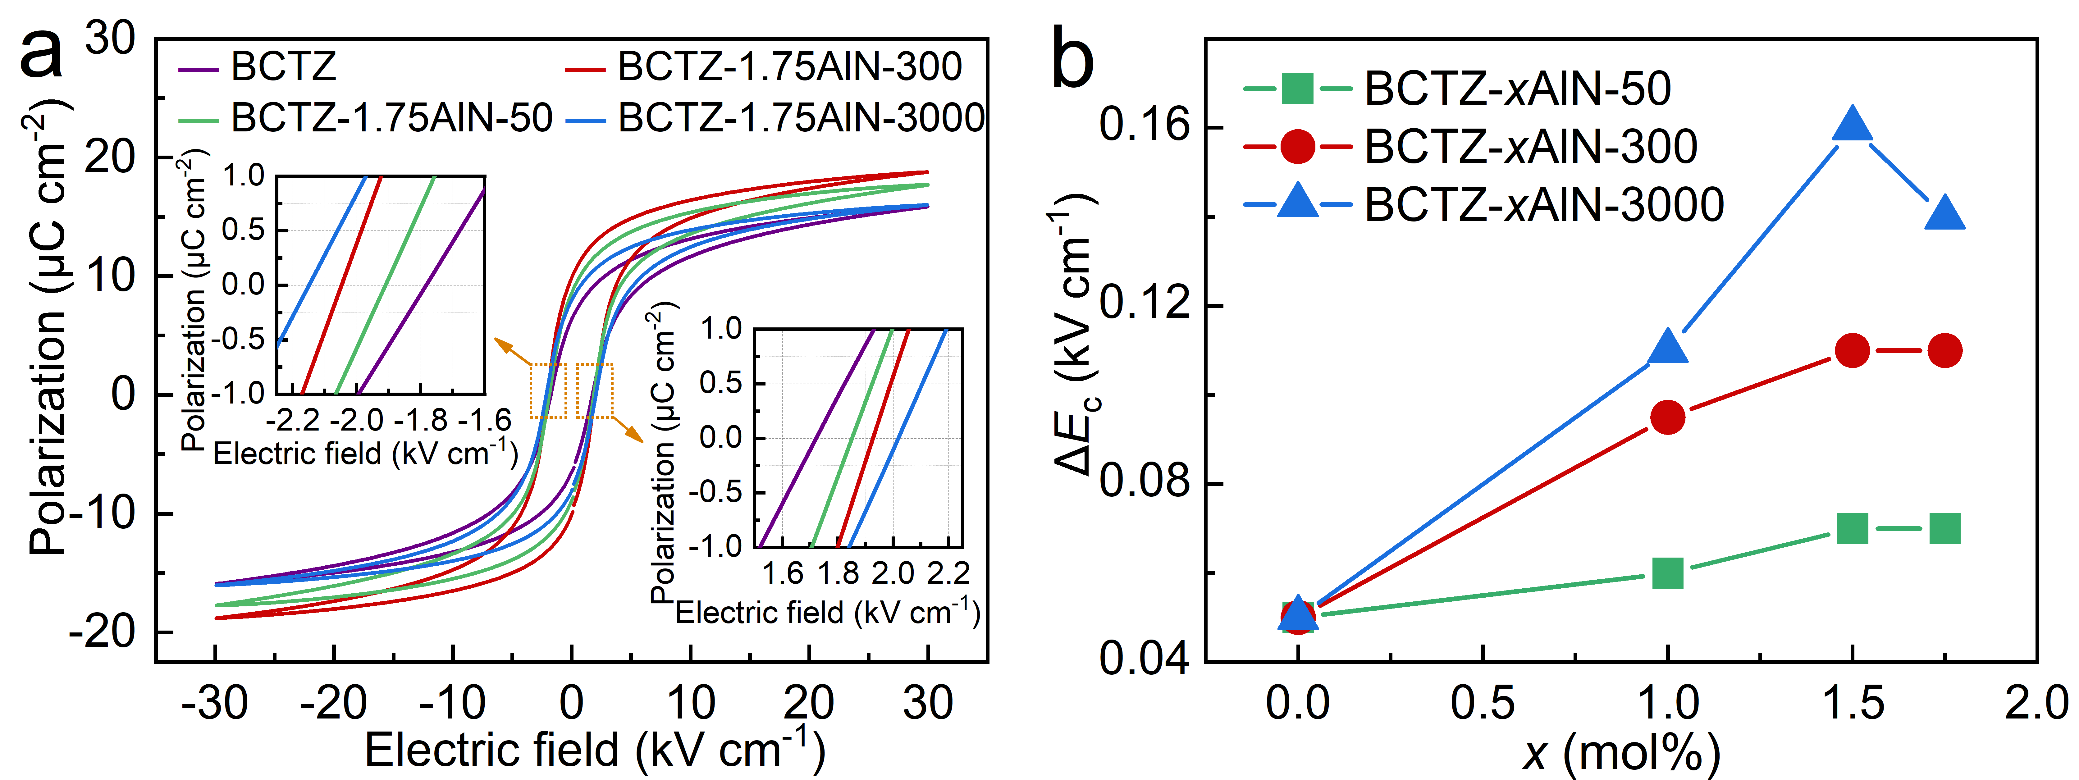


**Supplementary Fig. 35.** **a** The *P−E* loops curves of BCTZ, BCTZ−1.75AlN−50, BCTZ−1.75AlN−300, and BCTZ−1.75AlN−3000 ceramics measured at a frequency of 1 Hz. **b** The Δ*E*C of BCTZ−*x*AlN ceramics measured at 30 kV cm−1.





**Supplementary Fig. 36.** XPS spectra of O1s in the BCTZ−*x*AlN−300 ceramic.


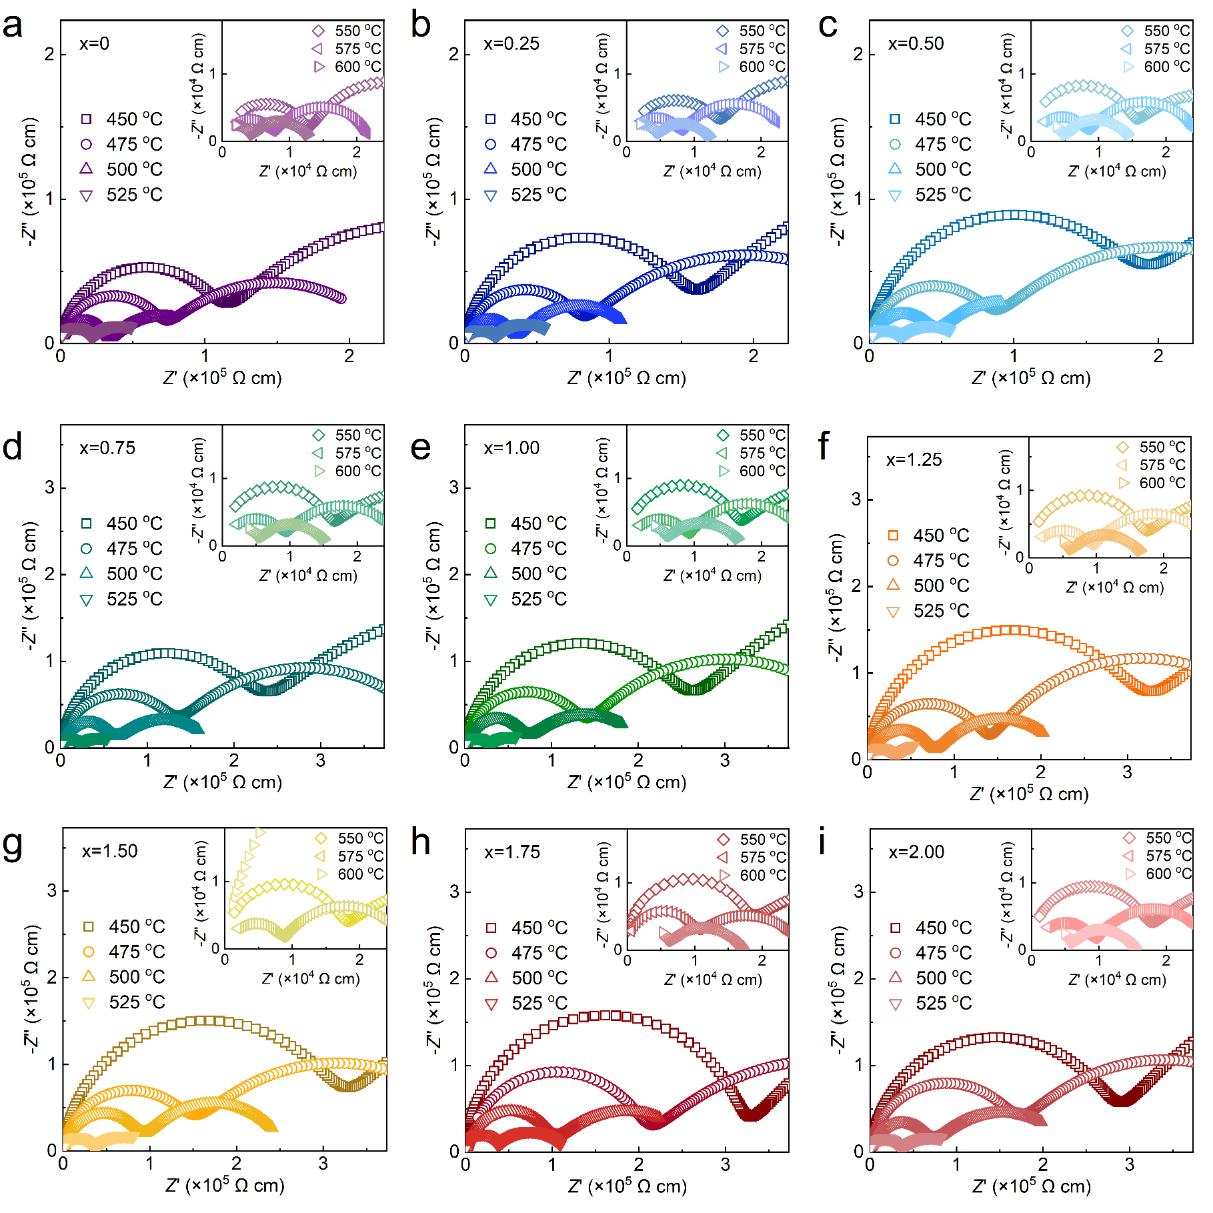


**Supplementary Fig. 37.** Impedance spectra of of BCTZ−*x*AlN−300 ceramics measured at 450-600 oC.


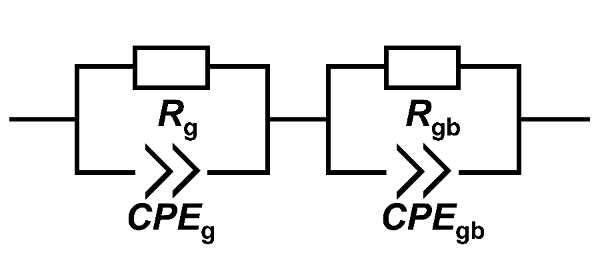


**Supplementary Fig. 38.** The equivalent circuit of impedance spectra of BCTZ−*x*AlN ceramics.


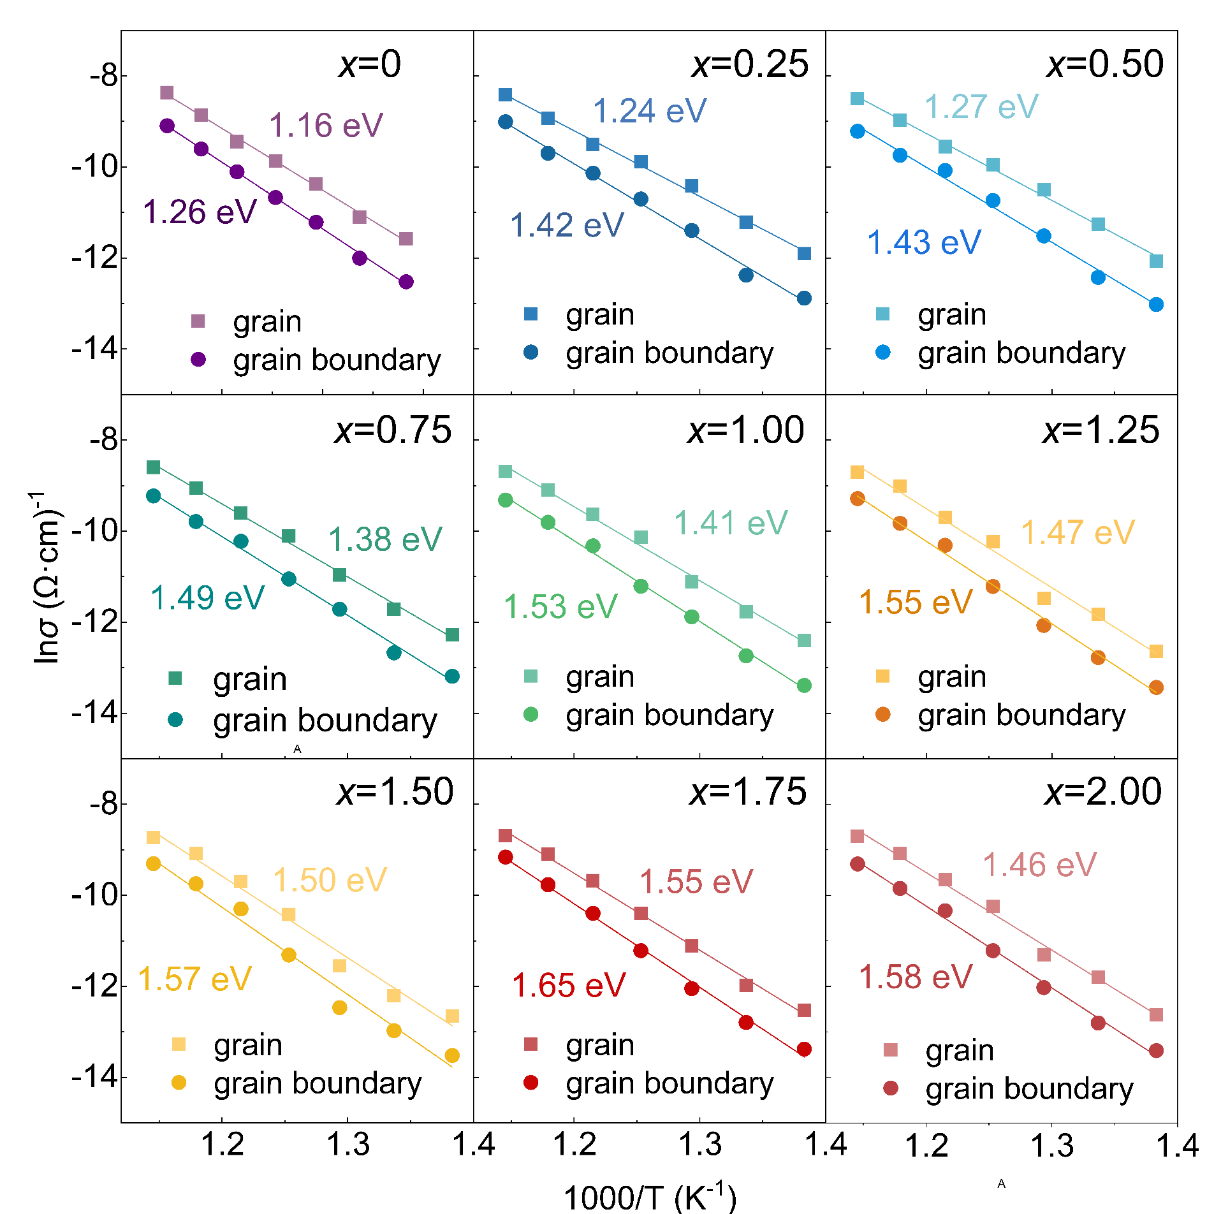


**Supplementary Fig. 39.** Arrhenius plots and the fitted *E*a values of BCTZ−*x*AlN−300 ceramics.

**3. Supplementary Table**

**Supplementary Table 1.** Comparison of *d*33 and *T*C of BT-based piezoceramics (detailed composition and data in Fig.2b).

| No. | Compositions | *d*33  (pC N−1) | *T*C  (oC) | Ref. |
| --- | --- | --- | --- | --- |
|  | (Ba0.85Ca0.15)(Zr0.1Ti0.9)O3−*x* mol% AlN (300 nm), *x*=1.75 | 650 | 95 | This work |
| 1 | (1-*x*)Ba(Ti0.8Hf0.2)O3-*x*(Ba0.7Ca0.3)TiO3, *x*=0.50 | 550 | 90 | [10] |
| 2 | (Ba1−*y*Ca*y*)(Ti1−*x*Hf*x*)O3, *x*=0.10 and *y*=0.15 | 540 | 95 | [11] |
| 3 | (1-*x*-*y*)BaTiO3-*y*CaTiO3-*x*(BaZr1-*z*Hf*z*)O3 at 0.065≤*x*≤0.085, 0.08≤*y*≤0.12 and 0≤z≤1.0 | 500 | 100 | [12] |
| 4 | (1-*x*)Ba(Hf*y*Ti1-*y*)O3-*x*(Ba1-*z*Ca*z*)TiO3, *x*=0.53, *y*=0.20, z=0.30 | 448 | 110 | [13] |
| 5 | (Ba0.95Ca0.05)(Ti0.9Sn0.1)O3-*x*CuO, at *x*=2 | 683 | 46 | [14] |
| 6 | BaTiO3-*x*(0.4CaTiO3-0.6BaSnO3), *x*=0-0.20 mol | 570 | 62 | [15] |
| 7 | (Ba0.91Ca0.09)(Ti0.916Sn0.084)O3 | 530 | 73 | [16] |
| 8 | (Ba0.925Ca0.075)(Ti0.90Sn0.10)O3 | 515 | 52 | [17] |
| 9 | (Ba0.84Ca0.15Sr0.01)(Ti0.90Zr0.09Sn0.01)O3 | 514 | 85 | [18] |
| 10 | (Ba0.95Ca0.05)(Ti0.90Sn0.10)O3+3 mol% of Li2CO3 | 485 | 52 | [19] |
| 11 | (Ba0.97Ca0.03)(Ti0.94Sn0.06)O3 | 440 | 63 | [20] |
| 12 | (Ba0.90Ca0.10)(Ti0.94Sn0.06)O3 | 405 | 90 | [21] |
| 13 | Ba0.85Ca0.15Zr0.1Ti0.9O3− *x* mol% Al2O3 | 638 | 91 | [3] |
| 14 | Ba0.85Ca0.15(Ti0.9Zr0.1)O3+4 wt.%CeO2 | 600 | 87 | [22] |
| 15 | (Ba0.85Ca0.15)(Ti0.9Zr0.1)O3+0.8 mol.%BiAlO3 | 568 | 72 | [6] |
| 16 | (Ba0.85Ca0.15)(Ti0.9Zr0.1)O3+0.02 mol.Y2O3 | 564 | 105 | [23] |
| 17 | (Ba0.85Ca0.15)(Zr0.10Ti0.90)O3+0.1 wt.%Ba(Cu0.5W0.5)O3 | 555 | 95 | [24] |
| 18 | [(Ba0.85Ca0.15)(Zr0.1Ti0.9)]O3-0.1 wt.%Sb2O3 | 556 | 87 | [7] |
| 19 | (Ba0.85-*x*Sr*x*Ca0.15)(Zr0.1Ti0.9)O3 at *x*=0.03 | 534 | 73 | [25] |
| 20 | Li-doped Ba0.85Ca0.15Ti0.9Zr0.1O3 | 512 | 79 | [26] |
| 21 | (Ba0.7Ca0.3)(Zr0.2Ti0.8)O3+0.5 wt.% SiO2 | 500 | 90 | [27] |
| 22 | Li-doped Ba0.85Ca0.15Ti0.9Zr0.1O3 | 493 | 75 | [28] |
| 23 | (Ba0.85Ca0.15)(Ti0.9Zr0.1)O3+0.2 mol.% V2O5 | 466 | 90 | [4] |
| 24 | (Ba0.85Ca0.15)(Ti0.915Zr0.085)O3+0.004 wt% CuO+1.5 wt%B2O3 | 462 | 95 | [29] |
| 25 | (Ba0.85Ca0.15)(Ti0.90Zr0.10)O3+0.04 wt.% Pr6O11 | 435 | 103 | [30] |
| 26 | (Ba0.85Ca0.15)(Ti0.9Zr0.1)O3+0.5 mol.% CuO | 403 | 92 | [31] |
| 27 | (Ba0.85Ca0.15)(Ti0.9Zr0.1)O3+0.15 wt.% MnO2 | 382 | 97 | [32] |
| 28 | (Ba0.85Ca0.15)(Zr0.1Ti0.9-*x*Ce*x*)O3+*y*Sb | 372 | 110 | [33] |
| 29 | Ba0.85Ca0.15Ti0.9Zr0.1O3+0.6 Li2CO3+*x* wt% Co | 316 | 82 | [5] |
| 30 | (Ba0.90Ca0.10)(Ti0.96Zr0.04)O3+0.05Nd*x*Y | 286 | 105 | [2] |

# 4. Supplementary References

[1] S. Yotthuan, C. Kornphom, S. Prasertpalichat, T. Suriwong, S. Pinitsoontorn, T. Bongkarn, *Phys. Status Solidi A* **2019**, 216, 1800803.

[2] Y. Tian, M. Ma, S. Li, J. Dong, X. Ji, H. Wu, J. Wang, Q. Jing, *Materials* **2023**, 16, 2369.

[3] X. Wang, Y. Huan, S. Ji, Y. Zhu, T. Wei, Z. Cheng, *Nano Energy* **2022**, 101, 107580.

[4] Y. Yang, J. Guo, W. Ma, H. Zhao, M. Ma, J. Wu, M. Chi, *J. Mater. Sci. Mater. Electron.* **2019**, 30, 2854.

[5] X. Huang, C. Gao, M. Huang, Z. Yue, *Ferroelectrics* **2015**, 481, 146.

[6] X. Chao, J. Wang, L. Wei, R. Gou, Z. Yang, *J. Mater. Sci. Mater. Electron.* **2015**, 26, 7331.

[7] J. Ma, X. Liu, M. Jiang, H. Yang, G. Chen, X. Liu, L. Qin, C. Luo, *J. Mater. Sci. Mater. Electron.* **2014**, 25, 992.

[8] C. Han, J. Wu, C. Pu, S. Qiao, B. Wu, J. Zhu, D. Xiao, *Ceram. Int.* **2012**, 38, 6359.

[9] N. Zhang, T. Zheng, N. Li, C. Zhao, J. Yin, Y. Zhang, H. Wu, S. J. Pennycook, J. Wu, *ACS Appl. Mater. Inter.* **2021**, 13, 7461.

[10] C. Zhou, W. Liu, D. Xue, X. Ren, H. Bao, J. Gao, L. Zhang, *Appl. Phys. Lett.* **2012**, 100, 222910.

[11] C. Zhao, W. Wu, H. Wang, J. Wu, *J. Appl. Phys.* **2016**, 119, 024108.

[12] C. Zhao, B. Wu, H.-C. Thong, J. Wu, *J. Eur. Ceram. Soc.* **2018**, 38, 5411.

[13] D. Wang, Z. Jiang, B. Yang, S. Zhang, M. Zhang, F. Guo, W. Cao, *J. Am. Ceram. Soc.* **2014**, 97, 3244.

[14] P.-F. Zhou, B.-P. Zhang, L. Zhao, X.-K. Zhao, L.-F. Zhu, L.-Q. Cheng, J.-F. Li, *Appl. Phys. Lett.* **2013**, 103, 172904.

[15] L.-F. Zhu, B.-P. Zhang, L. Zhao, J.-F. Li, *J. Mater. Chem. C* **2014**, 2, 4764.

[16] D. Xue, Y. Zhou, H. Bao, J. Gao, C. Zhou, X. Ren, *Appl. Phys. Lett.* **2011**, 99, 122901.

[17] W. Janbua, T. Bongkarn, T. Kolodiazhnyi, N. Vittayakorn, *RSC Adv.* **2017**, 7, 30166.

[18] X. Liu, Z. Chen, B. Fang, J. Ding, X. Zhao, H. Xu, H. Luo, *J. Alloys Compd.* **2015**, 640, 128.

[19] L. Zhao, B.-P. Zhang, P.-F. Zhou, X.-K. Zhao, L.-F. Zhu, *J. Am. Ceram. Soc.* **2014**, 97, 2164.

[20] W. Li, Z. Xu, R. Chu, P. Fu, G. Zang, *J. Eur. Ceram. Soc.* **2012**, 32, 517.

[21] M. Chen, Z. Xu, R. Chu, Y. Liu, L. Shao, W. Li, S. Gong, G. Li, *Mater. Lett.* **2013**, 97, 86.

[22] Y. Cui, X. Liu, M. Jiang, X. Zhao, X. Shan, W. Li, C. Yuan, C. Zhou, *Ceram. Int.* **2012**, 38, 4761.

[23] X. Wang, P. Liang, L. Wei, X. Chao, Z. Yang, *J. Mater. Sci. Mater. Electron.* **2015**, 26, 5217.

[24] W. Li, X. Liu, J. Ma, Y. Wu, Y. Cui, *J. Mater. Sci. Mater. Electron.* **2013**, 24, 1551.

[25] W. F. Bai, W. Li, B. Shen, J. W. Zhai, *Key Eng. Mater.* **2012**, 512-515, 1385.

[26] X. Chen, X. Ruan, K. Zhao, X. He, J. Zeng, Y. Li, L. Zheng, C. H. Park, G. Li, *J. Alloys Compd.* **2015**, 632, 103.

[27] W. Liu, S. Li, *IEEE T. Dielect. El. In.* **2015**, 22, 734.

[28] X. Chen, Y. Li, J. Zeng, L. Zheng, C. H. Park, G. Li, *J. Am. Ceram. Soc.* **2016**, 99, 2170.

[29] S.-H. Shin, J.-D. Han, J. Yoo, *Mater. Lett.* **2015**, 154, 120.

[30] I. Coondoo, N. Panwar, H. Amorín, V. E. Ramana, M. Algueró, A. Kholkin, *J. Am. Ceram. Soc.* **2015**, 98, 3127.

[31] T. Chen, T. Zhang, G. Wang, J. Zhou, J. Zhang, Y. Liu, *J. Mater. Sci.* **2012**, 47, 4612.

[32] J. Wu, Z. Wang, B. Zhang, J. Zhu, D. Xiao, *Integr. Ferroelectr.* **2013**, 141, 89.

[33] W. Zheng, J. Lin, X. Liu, W. Yang, Y. Li, *RSC Adv.* **2021**, 11, 2616.
